# Supplementary material for: Perspectives for sustainability analysis of scalable perovskite photovoltaics
Source: Royal Society of Chemistry journal article supplement (doi:10.1039/d4ee03956d), 2024-10-23
Supplement: d4ee03956d1.pdf [file d4ee03956d1.pdf]

Supplementary Information for

# Perspectives for Sustainability Analysis of Scalable Perovskite Photovoltaics

Xueyu Tian, Samuel D. Stranks, Jinsong Huang, Vasilis M. Fthenakis,  
Yang Yang, Fengqi You

This supplemental information file covers: (1) Data identifying the locations of perovskite companies; (2) Data on nip and pin perovskite solar cells; (3) Supplemental references.

## Supplemental tables

The data identifying the locations of perovskite solar panel developers, material providers, and equipment manufacturers are presented in Tables S1 to S3.

Table S1. Global overview of leading perovskite solar panel developers.

| #  | Company Name                                | Latitude | Longitude |
|----|---------------------------------------------|----------|-----------|
| 1  | Ascent Solar Technologies                   | 39.920   | -104.981  |
| 2  | Beijing Yaoneng Technology (Auner)          | 39.880   | 116.331   |
| 3  | Beyond Silicon                              | 33.392   | -111.858  |
| 4  | Caelux                                      | 34.153   | -118.077  |
| 5  | CubicPV                                     | 42.482   | -71.261   |
| 6  | DaZheng (Jiangsu) Micro-Nano Technologies   | 32.199   | 119.516   |
| 7  | EneCoat                                     | 34.882   | 135.763   |
| 8  | Enel Green Power                            | 41.917   | 12.505    |
| 9  | Energy America                              | 37.790   | -122.401  |
| 10 | Energy Materials Corp. (EMC)                | 43.204   | -77.627   |
| 11 | Evolar                                      | 33.438   | -111.943  |
| 12 | Evolisun Energy                             | 24.479   | 118.249   |
| 13 | First Solar                                 | 33.438   | -111.943  |
| 14 | Golden Solar New Energy Technology Holdings | 24.906   | 118.623   |
| 15 | Grape Solar                                 | 44.052   | -123.136  |
| 16 | Greatcell Energy                            | -28.125  | 153.449   |
| 17 | GreatCell Solar                             | -28.125  | 153.449   |

|    |                                        |         |          |
|----|----------------------------------------|---------|----------|
| 18 | Halldata Solar                         | 46.266  | -119.497 |
| 19 | Halocell Energy                        | -31.950 | 115.846  |
| 20 | Hanwha Q Cells                         | 37.568  | 126.989  |
| 21 | Hiking PV                              | 22.656  | 114.003  |
| 22 | Holosolis                              | 48.862  | 2.343    |
| 23 | Huasun Energy                          | 30.951  | 118.671  |
| 24 | Hunt Perovskite Technologies (CubicPV) | 32.787  | -96.799  |
| 25 | Jiangsu Akcome Science and Technology  | 30.283  | 120.035  |
| 26 | Jinko Solar                            | 31.199  | 121.316  |
| 27 | LONGi Green Energy Technology (LONGi)  | 34.356  | 108.943  |
| 28 | Mellow Energy / Vein Energy            | 23.116  | 113.266  |
| 29 | Microquanta Semiconductor              | 30.012  | 120.006  |
| 30 | Oxford Photovoltaics (Oxford PV)       | 51.817  | -1.283   |
| 31 | P3C                                    | 28.444  | 76.985   |
| 32 | Panasonic                              | 35.664  | 139.749  |
| 33 | Perovskia                              | 46.489  | 6.400    |
| 34 | Perovskite Innovation                  | 29.864  | 77.899   |
| 35 | Phenosolar                             | 22.364  | 114.131  |
| 36 | Power Roll                             | 54.910  | -1.485   |
| 37 | Quanwei Solar                          | 34.784  | 117.312  |
| 38 | Rayleigh Solar Tech                    | 44.661  | -63.541  |
| 39 | Red Solar Flower                       | 31.890  | 35.022   |
| 40 | RenShine Solar                         | 31.327  | 121.205  |
| 41 | Saule Technologies                     | 51.613  | 7.786    |
| 42 | Sekisui Chemical                       | 35.664  | 139.749  |
| 43 | Singfilm Solar                         | 1.353   | 103.696  |
| 44 | Solaires Enterprises                   | 48.437  | -123.364 |
| 45 | Solar-Tectic                           | 41.134  | -73.835  |
| 46 | Solertix                               | 41.863  | 12.502   |
| 47 | Solliance                              | 51.411  | 5.455    |
| 48 | SOLRA-PV                               | 31.776  | 35.198   |
| 49 | SunDensity Canada (QD Solar)           | 43.659  | -79.387  |
| 50 | Swift Solar                            | 37.497  | -122.244 |
| 51 | Taiwan Perovskite Technology           | 24.808  | 121.038  |
| 52 | Tandem PV                              | 37.413  | -122.109 |
| 53 | Toshiba                                | 35.652  | 139.760  |
| 54 | United Renewable Energy                | 34.119  | -84.200  |

|    |                                          |        |         |
|----|------------------------------------------|--------|---------|
| 55 | Verde Technologies                       | 44.896 | -93.441 |
| 56 | Voltec Solar                             | 48.542 | 7.436   |
| 57 | WattByWatt                               | 45.550 | -73.724 |
| 58 | Wuxi Utmost Light Technology (UtmoLight) | 31.597 | 120.510 |
| 59 | Xi'an Tianjiao New Energy                | 34.312 | 108.809 |

Table S2. Global overview of leading perovskite material providers.

| #  | Company Name               | Latitude | Longitude |
|----|----------------------------|----------|-----------|
| 1  | Greatcell Solar Materials  | -35.341  | 149.252   |
| 2  | Tokyo Chemical Industry    | 35.693   | 139.780   |
| 3  | Ajay SQM                   | 33.855   | -84.652   |
| 4  | Alfa Chemistry Materials   | 40.801   | -73.109   |
| 5  | American Perovskites       | 39.748   | -105.160  |
| 6  | Avantama                   | 47.238   | 8.750     |
| 7  | BlueDot Photonics          | 47.660   | -122.311  |
| 8  | BOC Sciences               | 40.844   | -72.878   |
| 9  | Borun                      | 29.868   | 121.531   |
| 10 | DOWA Electronics Materials | 35.701   | 139.775   |
| 11 | Dyename                    | 59.349   | 18.075    |
| 12 | Excyton                    | 54.671   | -1.453    |
| 13 | FrontMaterials             | 25.014   | 121.532   |
| 14 | Green Science Alliance     | 34.824   | 135.422   |
| 15 | Heliatek                   | 51.079   | 13.695    |
| 16 | ISE Chemicals              | 35.689   | 139.751   |
| 17 | Mendel Chemicals           | 46.980   | 28.884    |
| 18 | Microchem                  | 36.994   | 127.762   |
| 19 | Nanox                      | 46.797   | -71.321   |
| 20 | NANOXO                     | 52.229   | 20.967    |
| 21 | Ossila                     | 53.383   | -1.479    |
| 22 | PEROLED                    | 37.460   | 126.951   |
| 23 | Perotech Energy            | 35.948   | -79.079   |
| 24 | Quantum Materials Corp     | 29.845   | -97.977   |
| 25 | Quantum Solutions          | 50.961   | -1.425    |
| 26 | Sefar                      | 47.441   | 9.532     |
| 27 | SN Display                 | 37.453   | 126.959   |
| 28 | SoFab Inks                 | 38.281   | -85.571   |
| 29 | Solaris Chem               | 45.389   | -74.081   |
| 30 | Solaronix                  | 46.489   | 6.400     |

|    |                         |        |         |
|----|-------------------------|--------|---------|
| 31 | Solaveni                | 51.613 | 7.786   |
| 32 | Valais Perovskite Solar | 46.231 | 7.362   |
| 33 | VIVAN Life Sciences     | 19.199 | 72.947  |
| 34 | William Blythe          | 53.753 | -2.393  |
| 35 | Zeon Corporation        | 35.684 | 139.784 |
| 36 | Zhijing Nanotech        | 31.835 | 120.519 |

Table S3. Global overview of leading perovskite equipment manufacturers.

| #  | Company Name                  | Latitude | Longitude |
|----|-------------------------------|----------|-----------|
| 1  | Aixtron                       | 50.823   | 6.081     |
| 2  | Bergfeld Lasertech            | 50.786   | 6.075     |
| 3  | Brightspot Automation         | 40.219   | -105.077  |
| 4  | BT Imaging                    | -33.899  | 151.211   |
| 5  | Enli Technology               | 22.827   | 120.260   |
| 6  | Eternal Sun Spire             | 52.064   | 4.386     |
| 7  | FOM Technologies              | 55.662   | 12.576    |
| 8  | Gosan Tech                    | 36.829   | 127.128   |
| 9  | Inert                         | 42.857   | -70.908   |
| 10 | infinityPV                    | 55.758   | 12.133    |
| 11 | JACOMEX                       | 45.847   | 5.065     |
| 12 | Kortherm Science              | 37.517   | 126.718   |
| 13 | Kurt J. Lesker Company        | 40.290   | -79.910   |
| 14 | Lumartix                      | 46.489   | 6.402     |
| 15 | MBRAUN                        | 48.255   | 11.613    |
| 16 | Mitsubishi Diamond Industrial | 34.785   | 135.555   |
| 17 | nTact                         | 32.892   | -96.707   |
| 18 | Optigon                       | 42.382   | -71.101   |
| 19 | Park Systems                  | 37.293   | 127.044   |
| 20 | Peccell Technologies          | 35.566   | 139.518   |
| 21 | SALD                          | 51.455   | 5.392     |
| 22 | SC SOLAR                      | 31.331   | 120.529   |
| 23 | SparkNano                     | 51.488   | 5.496     |
| 24 | Toray Engineering             | 35.683   | 139.769   |

Table S4. Power conversion efficiency and  $T_{80}$  lifetime for nip perovskite solar cells. The data was extracted from the perovskite database by filtering for nip cells that contain valid efficiency and stability metrics.<sup>1</sup>

| Publication date | Cell architecture | PCE, % | $T_{80}$ , hr |
|------------------|-------------------|--------|---------------|
| 7/9/2013         | nip               | 9      | 500           |

|            |     |       |         |
|------------|-----|-------|---------|
| 4/29/2014  | nip | 4.2   | 72      |
| 6/24/2014  | nip | 11.4  | 125     |
| 7/24/2014  | nip | 7.42  | 4       |
| 7/24/2014  | nip | 7.93  | 8       |
| 9/18/2014  | nip | 14.4  | 336     |
| 11/6/2014  | nip | 10.7  | 400     |
| 12/19/2014 | nip | 15.3  | 720     |
| 3/23/2015  | nip | 13.26 | 420     |
| 6/11/2015  | nip | 14.5  | 2.6     |
| 6/11/2015  | nip | 9.9   | 28      |
| 6/16/2015  | nip | 11.75 | 800     |
| 7/23/2015  | nip | 14.57 | 24      |
| 8/14/2015  | nip | 7.5   | 2500    |
| 8/14/2015  | nip | 10    | 2500    |
| 8/26/2015  | nip | 5.5   | 888     |
| 8/26/2015  | nip | 16.56 | 120     |
| 8/27/2015  | nip | 14.8  | 36      |
| 8/27/2015  | nip | 12.8  | 36      |
| 9/28/2015  | nip | 6.12  | 600     |
| 10/23/2015 | nip | 12    | 30      |
| 10/23/2015 | nip | 12    | 420     |
| 11/20/2015 | nip | 4.86  | 46      |
| 11/23/2015 | nip | 17.35 | 200     |
| 11/23/2015 | nip | 14.38 | 50      |
| 11/30/2015 | nip | 16.67 | 162     |
| 11/30/2015 | nip | 17.21 | 333     |
| 12/3/2015  | nip | 13.34 | 720     |
| 12/18/2015 | nip | 14.2  | 130     |
| 1/10/2016  | nip | 8.93  | 14      |
| 1/26/2016  | nip | 15.4  | 0.5     |
| 1/28/2016  | nip | 10.67 | 184     |
| 1/28/2016  | nip | 13.8  | 162     |
| 1/28/2016  | nip | 14.8  | 100     |
| 1/29/2016  | nip | 15.9  | 156     |
| 1/29/2016  | nip | 13.69 | 75      |
| 2/3/2016   | nip | 17.24 | 31.74   |
| 2/3/2016   | nip | 18.4  | 731.90  |
| 2/3/2016   | nip | 18.24 | 1295.21 |
| 2/3/2016   | nip | 17.24 | 6.89    |
| 2/3/2016   | nip | 18.4  | 13.59   |
| 2/24/2016  | nip | 0.9   | 48      |
| 2/24/2016  | nip | 5.2   | 0.5     |
| 3/5/2016   | nip | 4.08  | 91      |
| 3/5/2016   | nip | 12.66 | 8       |
| 3/5/2016   | nip | 10.59 | 54      |

|           |     |       |         |
|-----------|-----|-------|---------|
| 3/9/2016  | nip | 7.85  | 0.4     |
| 3/9/2016  | nip | 3.04  | 2.25    |
| 3/11/2016 | nip | 12.9  | 168     |
| 4/15/2016 | nip | 13.4  | 8       |
| 5/2/2016  | nip | 9.08  | 96      |
| 5/9/2016  | nip | 5.86  | 288     |
| 5/16/2016 | nip | 12.5  | 10      |
| 5/16/2016 | nip | 14.2  | 40      |
| 5/17/2016 | nip | 5.94  | 0.02    |
| 5/24/2016 | nip | 9.73  | 168     |
| 5/24/2016 | nip | 11.52 | 168     |
| 5/24/2016 | nip | 13.15 | 120     |
| 6/14/2016 | nip | 6.88  | 105     |
| 6/14/2016 | nip | 14.33 | 2.33    |
| 6/14/2016 | nip | 16.53 | 2.91    |
| 6/16/2016 | nip | 9.97  | 60      |
| 6/20/2016 | nip | 12.17 | 84      |
| 6/27/2016 | nip | 12.4  | 400     |
| 6/27/2016 | nip | 8.7   | 100     |
| 6/28/2016 | nip | 15.9  | 500     |
| 7/1/2016  | nip | 2.47  | 105     |
| 7/1/2016  | nip | 2.47  | 5       |
| 7/3/2016  | nip | 11.91 | 150.384 |
| 7/8/2016  | nip | 8.08  | 0.83    |
| 7/8/2016  | nip | 9.74  | 0.05    |
| 7/9/2016  | nip | 11.18 | 216     |
| 7/9/2016  | nip | 12.62 | 312     |
| 7/26/2016 | nip | 18.25 | 1440    |
| 8/1/2016  | nip | 18.3  | 200     |
| 8/5/2016  | nip | 4.4   | 69      |
| 8/5/2016  | nip | 8.9   | 19      |
| 8/5/2016  | nip | 12.2  | 96      |
| 8/8/2016  | nip | 18    | 8.3     |
| 8/8/2016  | nip | 18    | 720     |
| 8/8/2016  | nip | 18.12 | 672     |
| 8/9/2016  | nip | 14    | 2       |
| 8/9/2016  | nip | 14.8  | 47      |
| 8/11/2016 | nip | 16.1  | 650     |
| 8/16/2016 | nip | 15.45 | 180     |
| 8/23/2016 | nip | 16    | 72      |
| 8/23/2016 | nip | 15    | 60      |
| 9/5/2016  | nip | 7.53  | 2880    |
| 9/15/2016 | nip | 20.8  | 60      |
| 9/19/2016 | nip | 11.26 | 120     |
| 9/27/2016 | nip | 16.9  | 480     |

|            |     |       |      |
|------------|-----|-------|------|
| 9/28/2016  | nip | 14.2  | 20   |
| 9/30/2016  | nip | 17.31 | 75   |
| 9/30/2016  | nip | 18.67 | 240  |
| 10/10/2016 | nip | 18.01 | 20   |
| 10/10/2016 | nip | 19.46 | 60   |
| 10/12/2016 | nip | 11.18 | 51   |
| 10/12/2016 | nip | 14.85 | 69   |
| 10/14/2016 | nip | 17.7  | 240  |
| 10/14/2016 | nip | 15.6  | 65   |
| 10/20/2016 | nip | 10.31 | 40   |
| 10/20/2016 | nip | 14.26 | 90   |
| 10/21/2016 | nip | 19.4  | 100  |
| 10/21/2016 | nip | 18.8  | 1    |
| 11/16/2016 | nip | 17.3  | 648  |
| 11/28/2016 | nip | 14.2  | 23   |
| 11/28/2016 | nip | 14    | 21   |
| 12/1/2016  | nip | 17.9  | 20.7 |
| 12/1/2016  | nip | 16.7  | 3423 |
| 12/1/2016  | nip | 13.4  | 1775 |
| 12/1/2016  | nip | 14.5  | 656  |
| 12/1/2016  | nip | 12.8  | 581  |
| 12/1/2016  | nip | 16.56 | 72   |
| 12/1/2016  | nip | 15.02 | 155  |
| 12/14/2016 | nip | 16.62 | 240  |
| 12/14/2016 | nip | 18.93 | 672  |
| 12/14/2016 | nip | 9.5   | 1    |
| 12/16/2016 | nip | 9.08  | 65   |
| 12/17/2016 | nip | 17.14 | 8.5  |
| 12/19/2016 | nip | 11.64 | 432  |
| 12/19/2016 | nip | 17.82 | 1000 |
| 12/27/2016 | nip | 11.6  | 1600 |
| 12/27/2016 | nip | 11.9  | 1200 |
| 1/5/2017   | nip | 8.62  | 30   |
| 1/5/2017   | nip | 7.97  | 200  |
| 1/5/2017   | nip | 7.92  | 100  |
| 1/5/2017   | nip | 12.3  | 50   |
| 1/10/2017  | nip | 14.6  | 342  |
| 1/13/2017  | nip | 12.05 | 360  |
| 1/26/2017  | nip | 15    | 1200 |
| 2/7/2017   | nip | 8.2   | 60   |
| 2/7/2017   | nip | 9.1   | 100  |
| 2/7/2017   | nip | 12.42 | 300  |
| 2/7/2017   | nip | 17.6  | 13   |
| 2/7/2017   | nip | 18.8  | 30   |
| 2/8/2017   | nip | 10.94 | 80   |

|           |     |       |       |
|-----------|-----|-------|-------|
| 2/8/2017  | nip | 12    | 300   |
| 2/8/2017  | nip | 12.1  | 0.7   |
| 2/9/2017  | nip | 14.92 | 160   |
| 2/9/2017  | nip | 16.74 | 160   |
| 2/9/2017  | nip | 13.3  | 160   |
| 2/9/2017  | nip | 15.01 | 160   |
| 2/10/2017 | nip | 7.06  | 700   |
| 2/13/2017 | nip | 17    | 720   |
| 2/14/2017 | nip | 9     | 48    |
| 2/28/2017 | nip | 9.15  | 20    |
| 3/9/2017  | nip | 13    | 45    |
| 3/9/2017  | nip | 17    | 85    |
| 3/9/2017  | nip | 12.62 | 168   |
| 3/9/2017  | nip | 18.59 | 50    |
| 3/9/2017  | nip | 20.26 | 50    |
| 3/14/2017 | nip | 18.91 | 1440  |
| 3/14/2017 | nip | 19.21 | 1440  |
| 3/20/2017 | nip | 14.9  | 0.5   |
| 3/22/2017 | nip | 15.89 | 5     |
| 3/25/2017 | nip | 14.8  | 1     |
| 3/25/2017 | nip | 16.83 | 1     |
| 3/25/2017 | nip | 12.2  | 1     |
| 3/25/2017 | nip | 16.07 | 2.6   |
| 3/27/2017 | nip | 16.9  | 100   |
| 3/29/2017 | nip | 19.03 | 50    |
| 3/29/2017 | nip | 19.01 | 20    |
| 3/29/2017 | nip | 11.6  | 168   |
| 3/31/2017 | nip | 11.6  | 216   |
| 3/31/2017 | nip | 9.7   | 216   |
| 4/7/2017  | nip | 14.6  | 3.7   |
| 4/7/2017  | nip | 15.48 | 5.48  |
| 4/7/2017  | nip | 16.5  | 5.6   |
| 4/7/2017  | nip | 15.08 | 5.94  |
| 4/7/2017  | nip | 14.83 | 6.46  |
| 4/10/2017 | nip | 18.4  | 720   |
| 4/10/2017 | nip | 10.2  | 100   |
| 4/13/2017 | nip | 20.8  | 1     |
| 4/19/2017 | nip | 15.96 | 2000  |
| 4/19/2017 | nip | 17.2  | 10    |
| 4/20/2017 | nip | 17.5  | 600   |
| 4/20/2017 | nip | 18.3  | 207.6 |
| 4/21/2017 | nip | 16    | 23    |
| 4/21/2017 | nip | 17.1  | 168   |
| 4/21/2017 | nip | 13.65 | 420   |
| 5/4/2017  | nip | 14.1  | 80    |



|           |     |       |      |
|-----------|-----|-------|------|
| 5/4/2017  | nip | 12    | 68   |
| 5/4/2017  | nip | 10.2  | 39   |
| 5/11/2017 | nip | 18.8  | 1    |
| 5/11/2017 | nip | 11.2  | 0.53 |
| 5/11/2017 | nip | 11.2  | 1.35 |
| 5/11/2017 | nip | 13.4  | 0.86 |
| 5/12/2017 | nip | 6.29  | 100  |
| 5/12/2017 | nip | 5.8   | 500  |
| 5/12/2017 | nip | 11.5  | 100  |
| 5/15/2017 | nip | 17.04 | 360  |
| 5/19/2017 | nip | 18.2  | 500  |
| 5/24/2017 | nip | 15.63 | 72   |
| 5/24/2017 | nip | 9.05  | 96   |
| 5/24/2017 | nip | 15.13 | 80   |
| 5/24/2017 | nip | 16.7  | 2    |
| 5/24/2017 | nip | 17.9  | 52   |
| 6/1/2017  | nip | 14.6  | 168  |
| 6/1/2017  | nip | 15.95 | 42   |
| 6/14/2017 | nip | 7.31  | 192  |
| 6/14/2017 | nip | 11.49 | 192  |
| 6/14/2017 | nip | 14.36 | 192  |
| 6/14/2017 | nip | 2.46  | 192  |
| 6/14/2017 | nip | 7.02  | 192  |
| 6/14/2017 | nip | 16.21 | 192  |
| 6/14/2017 | nip | 11.76 | 192  |
| 6/14/2017 | nip | 10.39 | 192  |
| 6/19/2017 | nip | 17.1  | 68   |
| 6/19/2017 | nip | 15.9  | 68   |
| 6/19/2017 | nip | 17.2  | 80   |
| 6/19/2017 | nip | 16.3  | 80   |
| 6/20/2017 | nip | 12.34 | 60   |
| 6/26/2017 | nip | 15.8  | 24   |
| 7/4/2017  | nip | 13.27 | 210  |
| 7/7/2017  | nip | 10.5  | 960  |
| 7/8/2017  | nip | 11.86 | 74   |
| 7/10/2017 | nip | 17    | 552  |
| 7/10/2017 | nip | 16.5  | 72   |
| 7/11/2017 | nip | 8.5   | 200  |
| 7/11/2017 | nip | 11    | 100  |
| 7/13/2017 | nip | 11.87 | 252  |
| 7/13/2017 | nip | 17.27 | 75   |
| 7/17/2017 | nip | 14.8  | 150  |
| 7/17/2017 | nip | 18.2  | 500  |
| 7/17/2017 | nip | 18    | 100  |
| 7/18/2017 | nip | 18.77 | 636  |

|           |     |       |       |
|-----------|-----|-------|-------|
| 7/18/2017 | nip | 17.39 | 417   |
| 7/19/2017 | nip | 17.27 | 24    |
| 7/19/2017 | nip | 17.36 | 1     |
| 7/24/2017 | nip | 15.16 | 1.75  |
| 7/24/2017 | nip | 16.06 | 3.75  |
| 7/26/2017 | nip | 15.12 | 960   |
| 7/28/2017 | nip | 13.14 | 2.7   |
| 7/28/2017 | nip | 15.1  | 7.2   |
| 8/1/2017  | nip | 18.9  | 1560  |
| 8/1/2017  | nip | 16.8  | 9     |
| 8/7/2017  | nip | 15.8  | 720   |
| 8/7/2017  | nip | 13.41 | 300   |
| 8/15/2017 | nip | 18.1  | 6     |
| 8/15/2017 | nip | 16.7  | 55    |
| 8/15/2017 | nip | 15.7  | 215   |
| 8/16/2017 | nip | 17.4  | 720   |
| 8/17/2017 | nip | 10.3  | 50    |
| 8/21/2017 | nip | 17.2  | 960   |
| 8/22/2017 | nip | 16.5  | 120   |
| 8/22/2017 | nip | 15.2  | 96    |
| 8/25/2017 | nip | 14.2  | 250   |
| 8/25/2017 | nip | 15.1  | 480   |
| 8/26/2017 | nip | 11.33 | 72    |
| 8/26/2017 | nip | 14.14 | 480   |
| 8/26/2017 | nip | 16.53 | 2400  |
| 8/31/2017 | nip | 16.2  | 380   |
| 8/31/2017 | nip | 17.71 | 380   |
| 9/1/2017  | nip | 17.1  | 912   |
| 9/4/2017  | nip | 19.16 | 400   |
| 9/14/2017 | nip | 17.36 | 500   |
| 9/14/2017 | nip | 15.25 | 205   |
| 9/15/2017 | nip | 12.84 | 32    |
| 9/15/2017 | nip | 14.75 | 39    |
| 9/18/2017 | nip | 17    | 336   |
| 9/18/2017 | nip | 20.02 | 240   |
| 9/20/2017 | nip | 20.4  | 50    |
| 9/20/2017 | nip | 16.7  | 125   |
| 9/20/2017 | nip | 20.4  | 200   |
| 9/20/2017 | nip | 16.7  | 400   |
| 9/21/2017 | nip | 10.7  | 210   |
| 9/21/2017 | nip | 12.9  | 479.3 |
| 9/21/2017 | nip | 10.7  | 171.5 |
| 9/24/2017 | nip | 3.44  | 100   |
| 9/25/2017 | nip | 9     | 638   |
| 9/25/2017 | nip | 8.12  | 18    |

|            |     |       |      |
|------------|-----|-------|------|
| 9/26/2017  | nip | 9.8   | 600  |
| 10/17/2017 | nip | 8.85  | 1440 |
| 10/17/2017 | nip | 9.01  | 400  |
| 10/17/2017 | nip | 10.1  | 1100 |
| 10/19/2017 | nip | 19.21 | 16.4 |
| 10/19/2017 | nip | 18.24 | 14   |
| 10/19/2017 | nip | 18.17 | 12.2 |
| 10/24/2017 | nip | 17.3  | 500  |
| 10/24/2017 | nip | 17.4  | 10   |
| 10/27/2017 | nip | 20.44 | 325  |
| 10/27/2017 | nip | 20.44 | 1    |
| 10/27/2017 | nip | 22.2  | 4    |
| 10/31/2017 | nip | 8.4   | 1.5  |
| 10/31/2017 | nip | 9.3   | 3    |
| 10/31/2017 | nip | 10.6  | 2.5  |
| 10/31/2017 | nip | 5.4   | 2.5  |
| 10/31/2017 | nip | 11    | 0.2  |
| 10/31/2017 | nip | 8.4   | 108  |
| 10/31/2017 | nip | 9.3   | 156  |
| 10/31/2017 | nip | 10.6  | 160  |
| 10/31/2017 | nip | 5.4   | 36   |
| 10/31/2017 | nip | 11    | 5    |
| 11/10/2017 | nip | 19.2  | 600  |
| 11/10/2017 | nip | 19.2  | 22   |
| 11/10/2017 | nip | 19.3  | 30   |
| 11/11/2017 | nip | 17.78 | 800  |
| 11/11/2017 | nip | 13.02 | 350  |
| 11/17/2017 | nip | 12.22 | 4.6  |
| 11/17/2017 | nip | 14.22 | 5.7  |
| 11/17/2017 | nip | 15.6  | 6.8  |
| 11/17/2017 | nip | 14.26 | 6.2  |
| 11/21/2017 | nip | 9.7   | 480  |
| 11/21/2017 | nip | 8.2   | 840  |
| 11/21/2017 | nip | 6.5   | 336  |
| 11/24/2017 | nip | 17.17 | 48   |
| 11/27/2017 | nip | 16.6  | 1.5  |
| 11/27/2017 | nip | 17.3  | 2    |
| 11/28/2017 | nip | 16.84 | 95   |
| 11/28/2017 | nip | 14    | 80   |
| 11/29/2017 | nip | 16.8  | 280  |
| 11/29/2017 | nip | 17.7  | 280  |
| 11/30/2017 | nip | 1.75  | 1000 |
| 12/1/2017  | nip | 16.77 | 600  |
| 12/1/2017  | nip | 18.88 | 50   |
| 12/1/2017  | nip | 18.3  | 30   |

|            |     |       |       |
|------------|-----|-------|-------|
| 12/1/2017  | nip | 18.14 | 50    |
| 12/1/2017  | nip | 18.99 | 30    |
| 12/6/2017  | nip | 16.39 | 319   |
| 12/6/2017  | nip | 17.46 | 1702  |
| 12/6/2017  | nip | 16.39 | 1.26  |
| 12/6/2017  | nip | 17.46 | 1.67  |
| 12/6/2017  | nip | 17.78 | 1.97  |
| 12/6/2017  | nip | 16.39 | 12.81 |
| 12/6/2017  | nip | 17.46 | 29.29 |
| 12/6/2017  | nip | 16.39 | 18.26 |
| 12/6/2017  | nip | 17.46 | 23.67 |
| 12/6/2017  | nip | 16.39 | 0.26  |
| 12/6/2017  | nip | 17.46 | 0.563 |
| 12/6/2017  | nip | 17.78 | 0.799 |
| 12/16/2017 | nip | 14.6  | 180   |
| 12/18/2017 | nip | 1.3   | 500   |
| 12/18/2017 | nip | 4     | 480   |
| 12/19/2017 | nip | 13.3  | 220   |
| 12/19/2017 | nip | 17.2  | 350   |
| 12/20/2017 | nip | 13.6  | 1582  |
| 12/21/2017 | nip | 8.5   | 36    |
| 12/21/2017 | nip | 15.1  | 120   |
| 12/22/2017 | nip | 17.9  | 500   |
| 12/26/2017 | nip | 17.13 | 1400  |
| 12/26/2017 | nip | 15.6  | 144   |
| 1/9/2018   | nip | 17.41 | 384   |
| 1/10/2018  | nip | 17.94 | 192   |
| 1/15/2018  | nip | 18.06 | 180   |
| 1/15/2018  | nip | 14.57 | 200   |
| 1/17/2018  | nip | 16    | 150   |
| 1/19/2018  | nip | 15.5  | 900   |
| 1/19/2018  | nip | 15.5  | 750   |
| 1/19/2018  | nip | 15    | 400   |
| 1/19/2018  | nip | 15    | 400   |
| 1/19/2018  | nip | 20.05 | 550   |
| 1/22/2018  | nip | 16.71 | 570   |
| 1/22/2018  | nip | 19.1  | 720   |
| 1/30/2018  | nip | 7.54  | 2880  |
| 2/5/2018   | nip | 7.62  | 100   |
| 2/7/2018   | nip | 18.4  | 1350  |
| 2/7/2018   | nip | 16.8  | 1200  |
| 2/8/2018   | nip | 20.08 | 80    |
| 2/8/2018   | nip | 18.65 | 1     |
| 2/13/2018  | nip | 17.02 | 45    |
| 2/13/2018  | nip | 18.51 | 85    |

|           |     |       |       |
|-----------|-----|-------|-------|
| 2/13/2018 | nip | 16.05 | 90    |
| 2/13/2018 | nip | 15.07 | 95    |
| 2/16/2018 | nip | 11.2  | 565   |
| 2/16/2018 | nip | 4.77  | 161   |
| 2/16/2018 | nip | 5.26  | 223   |
| 2/19/2018 | nip | 12.35 | 1     |
| 2/19/2018 | nip | 15.17 | 336   |
| 2/21/2018 | nip | 17.69 | 120   |
| 2/23/2018 | nip | 11.8  | 500   |
| 2/23/2018 | nip | 17.5  | 200   |
| 2/23/2018 | nip | 19.4  | 750   |
| 3/7/2018  | nip | 17.56 | 360   |
| 3/7/2018  | nip | 18.83 | 672   |
| 3/8/2018  | nip | 10.74 | 500   |
| 3/9/2018  | nip | 6.3   | 1824  |
| 3/9/2018  | nip | 6.3   | 1824  |
| 3/12/2018 | nip | 16.96 | 600   |
| 3/12/2018 | nip | 18.2  | 816   |
| 3/14/2018 | nip | 19    | 2     |
| 3/15/2018 | nip | 15.6  | 16    |
| 3/15/2018 | nip | 17    | 15    |
| 3/15/2018 | nip | 13.1  | 200   |
| 3/15/2018 | nip | 17    | 20    |
| 3/15/2018 | nip | 13.1  | 1000  |
| 3/16/2018 | nip | 2.82  | 10    |
| 3/16/2018 | nip | 2.46  | 90    |
| 3/16/2018 | nip | 6.44  | 40    |
| 3/20/2018 | nip | 16.39 | 1000  |
| 3/22/2018 | nip | 16.59 | 500   |
| 3/22/2018 | nip | 20.2  | 950   |
| 3/23/2018 | nip | 16.9  | 1080  |
| 3/23/2018 | nip | 10.9  | 1440  |
| 3/25/2018 | nip | 18.3  | 96    |
| 3/25/2018 | nip | 19.4  | 528   |
| 3/25/2018 | nip | 19.4  | 96    |
| 3/25/2018 | nip | 19.4  | 216   |
| 3/25/2018 | nip | 19.4  | 408   |
| 3/26/2018 | nip | 5.2   | 5     |
| 3/27/2018 | nip | 16.89 | 672   |
| 3/29/2018 | nip | 15.17 | 168   |
| 4/2/2018  | nip | 14.8  | 2640  |
| 4/3/2018  | nip | 15.76 | 61.3  |
| 4/3/2018  | nip | 18.6  | 330.6 |
| 4/3/2018  | nip | 19.12 | 197   |
| 4/10/2018 | nip | 15.17 | 305   |

|           |     |       |      |
|-----------|-----|-------|------|
| 4/11/2018 | nip | 7.92  | 40   |
| 4/11/2018 | nip | 9.4   | 80   |
| 4/16/2018 | nip | 16.86 | 50   |
| 4/17/2018 | nip | 14.6  | 264  |
| 4/17/2018 | nip | 19.12 | 600  |
| 4/17/2018 | nip | 17.4  | 500  |
| 4/17/2018 | nip | 19.7  | 12.5 |
| 4/19/2018 | nip | 7.53  | 58   |
| 4/19/2018 | nip | 6.14  | 144  |
| 4/23/2018 | nip | 21.25 | 1000 |
| 4/23/2018 | nip | 18.17 | 1000 |
| 4/24/2018 | nip | 13.3  | 168  |
| 4/24/2018 | nip | 17.7  | 340  |
| 4/25/2018 | nip | 5.45  | 288  |
| 4/26/2018 | nip | 11.92 | 700  |
| 4/26/2018 | nip | 9.69  | 96   |
| 5/1/2018  | nip | 15.4  | 220  |
| 5/3/2018  | nip | 16.2  | 720  |
| 5/7/2018  | nip | 16.3  | 360  |
| 5/8/2018  | nip | 1.86  | 400  |
| 5/9/2018  | nip | 14.3  | 8400 |
| 5/9/2018  | nip | 17.55 | 24   |
| 5/9/2018  | nip | 10.74 | 300  |
| 5/9/2018  | nip | 14.12 | 480  |
| 5/9/2018  | nip | 15.37 | 600  |
| 5/9/2018  | nip | 16.5  | 840  |
| 5/9/2018  | nip | 16.67 | 480  |
| 5/10/2018 | nip | 17.91 | 2.5  |
| 5/11/2018 | nip | 17.3  | 960  |
| 5/15/2018 | nip | 16.74 | 8    |
| 5/17/2018 | nip | 18.61 | 70   |
| 5/17/2018 | nip | 19.89 | 70   |
| 5/18/2018 | nip | 8.3   | 480  |
| 5/21/2018 | nip | 16.8  | 104  |
| 5/21/2018 | nip | 18.5  | 72   |
| 5/21/2018 | nip | 16.25 | 200  |
| 5/24/2018 | nip | 16.24 | 504  |
| 5/24/2018 | nip | 16.89 | 1056 |
| 5/25/2018 | nip | 18.12 | 345  |
| 5/25/2018 | nip | 16.75 | 337  |
| 5/26/2018 | nip | 9.12  | 192  |
| 5/29/2018 | nip | 10.81 | 25   |
| 5/29/2018 | nip | 18.58 | 75   |
| 5/29/2018 | nip | 19.94 | 260  |
| 5/29/2018 | nip | 12.93 | 40   |

|           |     |       |       |
|-----------|-----|-------|-------|
| 5/29/2018 | nip | 10.81 | 300   |
| 5/29/2018 | nip | 18.58 | 900   |
| 5/29/2018 | nip | 12.93 | 450   |
| 5/31/2018 | nip | 14.68 | 1000  |
| 6/1/2018  | nip | 18.2  | 10    |
| 6/1/2018  | nip | 18.8  | 24    |
| 6/1/2018  | nip | 18.2  | 150   |
| 6/1/2018  | nip | 4.38  | 0.002 |
| 6/1/2018  | nip | 10.99 | 0.002 |
| 6/6/2018  | nip | 18.08 | 540   |
| 6/6/2018  | nip | 14.68 | 120   |
| 6/7/2018  | nip | 14.1  | 350   |
| 6/8/2018  | nip | 19.57 | 700   |
| 6/12/2018 | nip | 15.67 | 300   |
| 6/12/2018 | nip | 17.77 | 320   |
| 6/12/2018 | nip | 17.88 | 420   |
| 6/12/2018 | nip | 18.12 | 400   |
| 6/12/2018 | nip | 18.62 | 300   |
| 6/12/2018 | nip | 18.62 | 20    |
| 6/12/2018 | nip | 8.55  | 12    |
| 6/12/2018 | nip | 10.26 | 200   |
| 6/18/2018 | nip | 12.17 | 573   |
| 7/2/2018  | nip | 7.18  | 70    |
| 7/2/2018  | nip | 16.46 | 15    |
| 7/3/2018  | nip | 12.6  | 5400  |
| 7/3/2018  | nip | 14.05 | 5400  |
| 7/3/2018  | nip | 12.24 | 5400  |
| 7/3/2018  | nip | 12.19 | 5400  |
| 7/4/2018  | nip | 14.1  | 300   |
| 7/5/2018  | nip | 20.15 | 435   |
| 7/7/2018  | nip | 16.08 | 216   |
| 7/9/2018  | nip | 8.51  | 111   |
| 7/9/2018  | nip | 10.04 | 430   |
| 7/10/2018 | nip | 12    | 720   |
| 7/10/2018 | nip | 15.2  | 120   |
| 7/10/2018 | nip | 17.9  | 165   |
| 7/13/2018 | nip | 14.16 | 360   |
| 7/13/2018 | nip | 16.9  | 2300  |
| 7/13/2018 | nip | 10.52 | 2712  |
| 7/13/2018 | nip | 10.8  | 240   |
| 7/13/2018 | nip | 20.45 | 314.4 |
| 7/13/2018 | nip | 20.45 | 8.2   |
| 7/13/2018 | nip | 20.57 | 54    |
| 7/13/2018 | nip | 20.51 | 194   |
| 7/17/2018 | nip | 8.7   | 20    |

|           |     |       |      |
|-----------|-----|-------|------|
| 7/17/2018 | nip | 19.5  | 10   |
| 7/17/2018 | nip | 18.44 | 50   |
| 7/24/2018 | nip | 6.04  | 720  |
| 7/25/2018 | nip | 10.74 | 4.5  |
| 7/25/2018 | nip | 11.78 | 7    |
| 7/25/2018 | nip | 11.9  | 7.5  |
| 7/25/2018 | nip | 12.12 | 9    |
| 7/26/2018 | nip | 13    | 400  |
| 7/26/2018 | nip | 16.8  | 523  |
| 7/26/2018 | nip | 16    | 128  |
| 7/26/2018 | nip | 15.02 | 121  |
| 7/26/2018 | nip | 13.43 | 106  |
| 7/30/2018 | nip | 21.52 | 600  |
| 7/30/2018 | nip | 19.48 | 100  |
| 8/2/2018  | nip | 6.5   | 96   |
| 8/2/2018  | nip | 10.5  | 12   |
| 8/3/2018  | nip | 13.6  | 0.5  |
| 8/3/2018  | nip | 12.06 | 48   |
| 8/3/2018  | nip | 14.21 | 168  |
| 8/7/2018  | nip | 19.2  | 1    |
| 8/7/2018  | nip | 19.2  | 120  |
| 8/9/2018  | nip | 14.4  | 17   |
| 8/11/2018 | nip | 10.32 | 2000 |
| 8/11/2018 | nip | 6.74  | 1008 |
| 8/15/2018 | nip | 10.1  | 1.75 |
| 8/16/2018 | nip | 15.2  | 360  |
| 8/17/2018 | nip | 16.46 | 288  |
| 8/20/2018 | nip | 11    | 265  |
| 8/20/2018 | nip | 19.01 | 1200 |
| 8/21/2018 | nip | 18.1  | 48   |
| 8/21/2018 | nip | 20.5  | 75   |
| 8/24/2018 | nip | 7.3   | 240  |
| 8/24/2018 | nip | 8.3   | 72   |
| 8/24/2018 | nip | 16.09 | 720  |
| 8/24/2018 | nip | 16.7  | 264  |
| 8/30/2018 | nip | 15.04 | 100  |
| 8/30/2018 | nip | 15.31 | 110  |
| 8/30/2018 | nip | 15.04 | 100  |
| 8/30/2018 | nip | 15.31 | 110  |
| 9/7/2018  | nip | 14.97 | 810  |
| 9/7/2018  | nip | 18.24 | 860  |
| 9/7/2018  | nip | 19.13 | 940  |
| 9/8/2018  | nip | 17.91 | 950  |
| 9/10/2018 | nip | 20.63 | 10   |
| 9/10/2018 | nip | 20.63 | 120  |



|            |     |       |        |
|------------|-----|-------|--------|
| 9/10/2018  | nip | 20.63 | 10     |
| 9/10/2018  | nip | 20.63 | 10     |
| 9/10/2018  | nip | 20.63 | 60     |
| 9/10/2018  | nip | 20.63 | 10     |
| 9/10/2018  | nip | 20.63 | 10     |
| 9/12/2018  | nip | 19.1  | 75     |
| 9/12/2018  | nip | 13.46 | 160    |
| 9/12/2018  | nip | 13.46 | 160    |
| 9/20/2018  | nip | 19.2  | 300    |
| 9/21/2018  | nip | 10.84 | 75     |
| 9/21/2018  | nip | 7.57  | 0.5    |
| 9/21/2018  | nip | 17.15 | 1000   |
| 9/24/2018  | nip | 11.58 | 1000   |
| 9/24/2018  | nip | 13.61 | 80     |
| 9/27/2018  | nip | 16.2  | 108    |
| 9/27/2018  | nip | 17.7  | 173    |
| 9/27/2018  | nip | 17.1  | 163    |
| 9/27/2018  | nip | 3.4   | 7      |
| 9/27/2018  | nip | 3.9   | 26     |
| 10/8/2018  | nip | 2.03  | 1500   |
| 10/8/2018  | nip | 4.32  | 1350   |
| 10/8/2018  | nip | 4.79  | 600    |
| 10/8/2018  | nip | 15.66 | 80     |
| 10/8/2018  | nip | 18.9  | 1500   |
| 10/8/2018  | nip | 20.3  | 2500   |
| 10/8/2018  | nip | 20.4  | 2500   |
| 10/8/2018  | nip | 18.9  | 1      |
| 10/8/2018  | nip | 20.3  | 1      |
| 10/8/2018  | nip | 20.4  | 1000   |
| 10/11/2018 | nip | 19.3  | 900    |
| 10/11/2018 | nip | 18.97 | 16     |
| 10/11/2018 | nip | 18.97 | 16     |
| 10/13/2018 | nip | 14.87 | 57     |
| 10/13/2018 | nip | 14.87 | 40     |
| 10/13/2018 | nip | 13.57 | 62     |
| 10/13/2018 | nip | 12.36 | 86     |
| 10/13/2018 | nip | 11.59 | 110    |
| 10/15/2018 | nip | 19.6  | 290    |
| 10/15/2018 | nip | 21.7  | 800    |
| 10/15/2018 | nip | 15.98 | 177.6  |
| 10/15/2018 | nip | 18.1  | 266.64 |
| 10/15/2018 | nip | 15.98 | 340.8  |
| 10/15/2018 | nip | 17.1  | 100    |
| 10/15/2018 | nip | 17.41 | 120    |
| 10/15/2018 | nip | 18.53 | 960    |

|            |     |       |        |
|------------|-----|-------|--------|
| 10/15/2018 | nip | 17.34 | 100    |
| 10/15/2018 | nip | 16.99 | 72     |
| 10/15/2018 | nip | 17.87 | 100    |
| 10/16/2018 | nip | 19.7  | 480    |
| 10/19/2018 | nip | 15.92 | 840    |
| 10/19/2018 | nip | 14.09 | 120    |
| 10/25/2018 | nip | 11.12 | 350    |
| 10/26/2018 | nip | 12.45 | 95     |
| 10/26/2018 | nip | 11.91 | 400    |
| 10/26/2018 | nip | 11.91 | 55     |
| 10/26/2018 | nip | 13.21 | 300    |
| 10/26/2018 | nip | 13.21 | 100    |
| 10/29/2018 | nip | 19.06 | 400    |
| 10/29/2018 | nip | 15.22 | 1000   |
| 11/6/2018  | nip | 6.96  | 240    |
| 11/8/2018  | nip | 17    | 72     |
| 11/8/2018  | nip | 16    | 72     |
| 11/9/2018  | nip | 0.41  | 720    |
| 11/12/2018 | nip | 17.08 | 5      |
| 11/12/2018 | nip | 20.48 | 15     |
| 11/13/2018 | nip | 18.7  | 1000   |
| 11/13/2018 | nip | 18.09 | 900    |
| 11/14/2018 | nip | 16    | 600    |
| 11/14/2018 | nip | 19.1  | 432    |
| 11/14/2018 | nip | 18.4  | 48     |
| 11/15/2018 | nip | 18.92 | 600    |
| 11/16/2018 | nip | 13.7  | 5      |
| 11/16/2018 | nip | 15.9  | 6      |
| 11/19/2018 | nip | 20.7  | 1500   |
| 11/20/2018 | nip | 13.2  | 360    |
| 11/21/2018 | nip | 14.5  | 170    |
| 11/21/2018 | nip | 15.18 | 170    |
| 11/21/2018 | nip | 11.42 | 170    |
| 11/21/2018 | nip | 16.87 | 300    |
| 11/26/2018 | nip | 9     | 323.28 |
| 11/26/2018 | nip | 9.13  | 323.28 |
| 11/26/2018 | nip | 9.23  | 439.68 |
| 11/26/2018 | nip | 4.13  | 307.44 |
| 11/26/2018 | nip | 3.91  | 383.28 |
| 11/26/2018 | nip | 3.5   | 359.52 |
| 12/3/2018  | nip | 19.92 | 300    |
| 12/4/2018  | nip | 17    | 982    |
| 12/4/2018  | nip | 19.5  | 1000   |
| 12/4/2018  | nip | 19.5  | 1000   |
| 12/5/2018  | nip | 18.8  | 24     |

|            |     |       |      |
|------------|-----|-------|------|
| 12/5/2018  | nip | 10.25 | 75   |
| 12/8/2018  | nip | 0.7   | 60   |
| 12/8/2018  | nip | 5.86  | 243  |
| 12/10/2018 | nip | 17.01 | 150  |
| 12/12/2018 | nip | 15.14 | 651  |
| 12/12/2018 | nip | 11.7  | 80   |
| 12/13/2018 | nip | 17.81 | 350  |
| 12/16/2018 | nip | 15.9  | 528  |
| 12/21/2018 | nip | 8.11  | 60   |
| 12/21/2018 | nip | 12.62 | 90   |
| 1/2/2019   | nip | 18.33 | 150  |
| 1/2/2019   | nip | 0.27  | 408  |
| 1/2/2019   | nip | 10.4  | 140  |
| 1/2/2019   | nip | 9.73  | 27   |
| 1/5/2019   | nip | 17.96 | 500  |
| 1/8/2019   | nip | 2.07  | 50   |
| 1/8/2019   | nip | 5.29  | 170  |
| 1/9/2019   | nip | 9.15  | 100  |
| 1/9/2019   | nip | 5.7   | 480  |
| 1/9/2019   | nip | 6.6   | 480  |
| 1/9/2019   | nip | 8     | 720  |
| 1/11/2019  | nip | 12.78 | 8.5  |
| 1/11/2019  | nip | 14.73 | 14.2 |
| 1/11/2019  | nip | 17.23 | 1    |
| 1/11/2019  | nip | 16.29 | 1    |
| 1/11/2019  | nip | 16.77 | 280  |
| 1/11/2019  | nip | 15.63 | 36   |
| 1/11/2019  | nip | 14.52 | 160  |
| 1/12/2019  | nip | 14.23 | 288  |
| 1/12/2019  | nip | 15.96 | 364  |
| 1/16/2019  | nip | 14.65 | 19   |
| 1/17/2019  | nip | 18.6  | 50   |
| 1/21/2019  | nip | 18.96 | 55   |
| 1/21/2019  | nip | 5.13  | 300  |
| 1/21/2019  | nip | 18.13 | 1000 |
| 1/21/2019  | nip | 18.13 | 400  |
| 1/21/2019  | nip | 18.13 | 140  |
| 1/21/2019  | nip | 18.96 | 400  |
| 1/21/2019  | nip | 18.96 | 80   |
| 1/21/2019  | nip | 18.96 | 50   |
| 1/21/2019  | nip | 18.96 | 25   |
| 1/21/2019  | nip | 18.11 | 60   |
| 1/21/2019  | nip | 18.11 | 30   |
| 1/24/2019  | nip | 15.6  | 48   |
| 1/25/2019  | nip | 5.7   | 100  |

|           |     |       |      |
|-----------|-----|-------|------|
| 1/25/2019 | nip | 10.8  | 168  |
| 1/28/2019 | nip | 17.41 | 250  |
| 1/29/2019 | nip | 13.16 | 15   |
| 1/29/2019 | nip | 8.32  | 1    |
| 1/29/2019 | nip | 19.01 | 1200 |
| 1/31/2019 | nip | 16.94 | 475  |
| 2/1/2019  | nip | 20.56 | 1200 |
| 2/1/2019  | nip | 15.6  | 110  |
| 2/1/2019  | nip | 18.82 | 110  |
| 2/1/2019  | nip | 13.01 | 33   |
| 2/1/2019  | nip | 10.35 | 387  |
| 2/1/2019  | nip | 15.27 | 445  |
| 2/2/2019  | nip | 5.83  | 94   |
| 2/2/2019  | nip | 8.28  | 96   |
| 2/2/2019  | nip | 10.73 | 97   |
| 2/2/2019  | nip | 13.22 | 99   |
| 2/2/2019  | nip | 10.41 | 87   |
| 2/4/2019  | nip | 20.23 | 2400 |
| 2/5/2019  | nip | 17.23 | 700  |
| 2/5/2019  | nip | 18.34 | 700  |
| 2/5/2019  | nip | 5.28  | 215  |
| 2/6/2019  | nip | 18.12 | 350  |
| 2/6/2019  | nip | 18.82 | 350  |
| 2/6/2019  | nip | 19.07 | 350  |
| 2/11/2019 | nip | 18.89 | 10   |
| 2/14/2019 | nip | 20.62 | 1440 |
| 2/14/2019 | nip | 14.2  | 200  |
| 2/15/2019 | nip | 15.41 | 250  |
| 2/15/2019 | nip | 14.36 | 250  |
| 2/16/2019 | nip | 18.09 | 720  |
| 2/18/2019 | nip | 20.03 | 800  |
| 2/18/2019 | nip | 18.72 | 800  |
| 2/18/2019 | nip | 16.13 | 500  |
| 2/18/2019 | nip | 17.07 | 600  |
| 2/18/2019 | nip | 18.83 | 600  |
| 2/18/2019 | nip | 18.95 | 70   |
| 2/19/2019 | nip | 8.3   | 250  |
| 2/20/2019 | nip | 14.13 | 90   |
| 2/20/2019 | nip | 17.09 | 300  |
| 2/22/2019 | nip | 15.2  | 650  |
| 2/22/2019 | nip | 2.66  | 8    |
| 2/22/2019 | nip | 2     | 720  |
| 2/22/2019 | nip | 0.706 | 985  |
| 2/22/2019 | nip | 1.57  | 30   |
| 2/22/2019 | nip | 11.02 | 16   |

|           |     |       |        |
|-----------|-----|-------|--------|
| 2/22/2019 | nip | 15.5  | 1      |
| 2/26/2019 | nip | 5.36  | 2500   |
| 2/26/2019 | nip | 12.23 | 5      |
| 2/26/2019 | nip | 16.47 | 10     |
| 2/26/2019 | nip | 7.23  | 5      |
| 2/26/2019 | nip | 14.75 | 10     |
| 2/26/2019 | nip | 18.18 | 23     |
| 2/26/2019 | nip | 16.06 | 10     |
| 2/26/2019 | nip | 15.97 | 15     |
| 2/26/2019 | nip | 16.68 | 10     |
| 2/26/2019 | nip | 18.36 | 23     |
| 2/27/2019 | nip | 10.49 | 1600   |
| 2/28/2019 | nip | 19.31 | 550    |
| 2/28/2019 | nip | 19.31 | 53.33  |
| 2/28/2019 | nip | 20.24 | 274.84 |
| 3/4/2019  | nip | 15.34 | 1920   |
| 3/6/2019  | nip | 19.43 | 150    |
| 3/6/2019  | nip | 19.3  | 285    |
| 3/7/2019  | nip | 18.61 | 600    |
| 3/7/2019  | nip | 16.37 | 400    |
| 3/11/2019 | nip | 18.67 | 50     |
| 3/11/2019 | nip | 20.62 | 65     |
| 3/12/2019 | nip | 15.5  | 20     |
| 3/12/2019 | nip | 19.62 | 0.1    |
| 3/15/2019 | nip | 16.46 | 50     |
| 3/15/2019 | nip | 17.92 | 120    |
| 3/15/2019 | nip | 20.12 | 1000   |
| 3/18/2019 | nip | 8.8   | 150    |
| 3/18/2019 | nip | 13.2  | 350    |
| 3/18/2019 | nip | 17.11 | 720    |
| 3/18/2019 | nip | 19.41 | 156    |
| 3/20/2019 | nip | 18.45 | 200    |
| 3/23/2019 | nip | 18.23 | 340    |
| 3/23/2019 | nip | 16.23 | 720    |
| 3/26/2019 | nip | 9.84  | 783    |
| 3/26/2019 | nip | 6.62  | 768    |
| 3/26/2019 | nip | 17.41 | 300    |
| 3/27/2019 | nip | 23.9  | 1000   |
| 3/29/2019 | nip | 18.33 | 600    |
| 3/30/2019 | nip | 11.2  | 1440   |
| 4/1/2019  | nip | 19.15 | 500    |
| 4/1/2019  | nip | 17.27 | 500    |
| 4/1/2019  | nip | 19.31 | 84     |
| 4/4/2019  | nip | 19.24 | 1000   |
| 4/7/2019  | nip | 12.55 | 120    |

|           |     |       |      |
|-----------|-----|-------|------|
| 4/8/2019  | nip | 18.4  | 816  |
| 4/9/2019  | nip | 5.81  | 220  |
| 4/10/2019 | nip | 17.6  | 150  |
| 4/10/2019 | nip | 17.6  | 75   |
| 4/11/2019 | nip | 14.86 | 100  |
| 4/11/2019 | nip | 17.21 | 312  |
| 4/11/2019 | nip | 14.86 | 3.5  |
| 4/11/2019 | nip | 17.21 | 4.5  |
| 4/12/2019 | nip | 13    | 400  |
| 4/17/2019 | nip | 17.09 | 400  |
| 4/18/2019 | nip | 12.5  | 20   |
| 4/20/2019 | nip | 7.54  | 48   |
| 4/20/2019 | nip | 6.43  | 528  |
| 4/23/2019 | nip | 14.55 | 1000 |
| 4/26/2019 | nip | 9.94  | 1000 |
| 4/26/2019 | nip | 11.7  | 0.1  |
| 4/26/2019 | nip | 13.7  | 2    |
| 4/28/2019 | nip | 6.23  | 100  |
| 4/28/2019 | nip | 12.13 | 270  |
| 5/1/2019  | nip | 12.6  | 45   |
| 5/1/2019  | nip | 13.4  | 60   |
| 5/1/2019  | nip | 14.9  | 72   |
| 5/1/2019  | nip | 13    | 54   |
| 5/6/2019  | nip | 16.52 | 450  |
| 5/7/2019  | nip | 10.78 | 192  |
| 5/10/2019 | nip | 18.94 | 2160 |
| 5/15/2019 | nip | 19.68 | 500  |
| 5/15/2019 | nip | 19.68 | 600  |
| 5/15/2019 | nip | 21.92 | 400  |
| 5/16/2019 | nip | 16.2  | 1440 |
| 5/17/2019 | nip | 18.7  | 52   |
| 5/19/2019 | nip | 15.72 | 320  |
| 5/20/2019 | nip | 10.29 | 720  |
| 5/22/2019 | nip | 17.68 | 500  |
| 5/22/2019 | nip | 17.5  | 300  |
| 5/28/2019 | nip | 16.86 | 550  |
| 5/28/2019 | nip | 17.23 | 750  |
| 6/1/2019  | nip | 18.71 | 400  |
| 6/7/2019  | nip | 19.97 | 300  |
| 6/10/2019 | nip | 20    | 1    |
| 6/11/2019 | nip | 1.49  | 1.5  |
| 6/11/2019 | nip | 10.02 | 12   |
| 6/11/2019 | nip | 8.13  | 8.8  |
| 6/12/2019 | nip | 19.2  | 290  |
| 6/12/2019 | nip | 19.2  | 800  |

|           |     |       |      |
|-----------|-----|-------|------|
| 6/13/2019 | nip | 9.79  | 624  |
| 6/13/2019 | nip | 19.16 | 1600 |
| 6/19/2019 | nip | 15.51 | 250  |
| 6/19/2019 | nip | 10.12 | 72   |
| 6/19/2019 | nip | 17.23 | 400  |
| 6/19/2019 | nip | 15.59 | 70   |
| 6/20/2019 | nip | 17.43 | 549  |
| 6/20/2019 | nip | 14.97 | 165  |
| 6/21/2019 | nip | 14.73 | 2.5  |
| 6/22/2019 | nip | 6.96  | 245  |
| 6/25/2019 | nip | 14.7  | 1780 |
| 6/25/2019 | nip | 10.9  | 2300 |
| 6/26/2019 | nip | 21.2  | 720  |
| 6/27/2019 | nip | 12.07 | 45   |
| 6/27/2019 | nip | 12.87 | 370  |
| 6/28/2019 | nip | 15.52 | 10   |
| 6/28/2019 | nip | 14.2  | 100  |
| 6/28/2019 | nip | 18    | 2    |
| 6/28/2019 | nip | 19.7  | 0.5  |
| 6/28/2019 | nip | 18    | 1    |
| 6/28/2019 | nip | 19.7  | 2    |
| 7/2/2019  | nip | 16.04 | 5    |
| 7/2/2019  | nip | 19.8  | 500  |
| 7/3/2019  | nip | 17.39 | 300  |
| 7/4/2019  | nip | 14.38 | 250  |
| 7/8/2019  | nip | 19.8  | 437  |
| 7/8/2019  | nip | 20.8  | 63   |
| 7/9/2019  | nip | 11.81 | 216  |
| 7/9/2019  | nip | 14.73 | 216  |
| 7/9/2019  | nip | 19.85 | 540  |
| 7/9/2019  | nip | 4.1   | 26   |
| 7/9/2019  | nip | 7.5   | 110  |
| 7/9/2019  | nip | 9.4   | 480  |
| 7/11/2019 | nip | 15.43 | 528  |
| 7/15/2019 | nip | 20.61 | 480  |
| 7/16/2019 | nip | 11.88 | 1440 |
| 7/21/2019 | nip | 17.8  | 1600 |
| 7/21/2019 | nip | 19    | 2240 |
| 7/21/2019 | nip | 18.1  | 2586 |
| 7/23/2019 | nip | 19.01 | 480  |
| 7/23/2019 | nip | 17.41 | 270  |
| 7/30/2019 | nip | 8.16  | 1440 |
| 7/31/2019 | nip | 18.56 | 173  |
| 7/31/2019 | nip | 17.36 | 60   |
| 8/1/2019  | nip | 12.43 | 20   |

|           |     |       |      |
|-----------|-----|-------|------|
| 8/2/2019  | nip | 17.14 | 6000 |
| 8/2/2019  | nip | 19.87 | 100  |
| 8/2/2019  | nip | 21.03 | 250  |
| 8/6/2019  | nip | 20.1  | 141  |
| 8/6/2019  | nip | 18    | 504  |
| 8/7/2019  | nip | 17.16 | 500  |
| 8/9/2019  | nip | 18.9  | 270  |
| 8/9/2019  | nip | 15    | 150  |
| 8/9/2019  | nip | 14.2  | 40   |
| 8/9/2019  | nip | 14.19 | 168  |
| 8/10/2019 | nip | 12.06 | 33   |
| 8/10/2019 | nip | 13.12 | 62   |
| 8/10/2019 | nip | 12.27 | 124  |
| 8/11/2019 | nip | 8.32  | 7    |
| 8/12/2019 | nip | 6     | 3.3  |
| 8/13/2019 | nip | 18    | 99   |
| 8/13/2019 | nip | 17.5  | 100  |
| 8/14/2019 | nip | 16.48 | 70   |
| 8/20/2019 | nip | 8.99  | 55   |
| 8/20/2019 | nip | 5.98  | 90   |
| 8/20/2019 | nip | 3.29  | 80   |
| 8/22/2019 | nip | 17    | 384  |
| 8/23/2019 | nip | 6.3   | 10   |
| 8/23/2019 | nip | 8.74  | 30   |
| 8/23/2019 | nip | 10.73 | 90   |
| 8/23/2019 | nip | 5.58  | 5    |
| 8/23/2019 | nip | 6.91  | 22   |
| 8/23/2019 | nip | 16.71 | 200  |
| 8/23/2019 | nip | 16.71 | 50   |
| 8/26/2019 | nip | 19.22 | 180  |
| 8/27/2019 | nip | 17.11 | 330  |
| 8/27/2019 | nip | 19.23 | 160  |
| 9/2/2019  | nip | 10.26 | 1440 |
| 9/2/2019  | nip | 11.28 | 1440 |
| 9/3/2019  | nip | 18.31 | 277  |
| 9/3/2019  | nip | 20.86 | 277  |
| 9/4/2019  | nip | 19.11 | 85   |
| 9/4/2019  | nip | 19.11 | 30   |
| 9/4/2019  | nip | 21.3  | 110  |
| 9/4/2019  | nip | 19.11 | 18   |
| 9/4/2019  | nip | 21.3  | 35   |
| 9/4/2019  | nip | 19.11 | 35   |
| 9/6/2019  | nip | 6.91  | 100  |
| 9/10/2019 | nip | 17.9  | 150  |
| 9/10/2019 | nip | 19.3  | 980  |



|            |     |       |      |
|------------|-----|-------|------|
| 9/10/2019  | nip | 21.24 | 230  |
| 9/10/2019  | nip | 19.32 | 120  |
| 9/10/2019  | nip | 21.24 | 480  |
| 9/10/2019  | nip | 19.32 | 250  |
| 9/11/2019  | nip | 7.41  | 80   |
| 9/11/2019  | nip | 10.55 | 85   |
| 9/18/2019  | nip | 15.32 | 720  |
| 9/18/2019  | nip | 16.9  | 900  |
| 9/18/2019  | nip | 18.7  | 10   |
| 9/19/2019  | nip | 15.23 | 50   |
| 9/19/2019  | nip | 7.54  | 150  |
| 9/20/2019  | nip | 12.53 | 1    |
| 9/20/2019  | nip | 12.53 | 48   |
| 9/25/2019  | nip | 14.57 | 1400 |
| 9/27/2019  | nip | 14.5  | 1200 |
| 9/27/2019  | nip | 20.93 | 720  |
| 9/27/2019  | nip | 9.41  | 86   |
| 10/1/2019  | nip | 15.6  | 160  |
| 10/2/2019  | nip | 18.59 | 10   |
| 10/7/2019  | nip | 10.1  | 100  |
| 10/8/2019  | nip | 20.2  | 19.5 |
| 10/8/2019  | nip | 21.44 | 20.3 |
| 10/8/2019  | nip | 16.1  | 1500 |
| 10/9/2019  | nip | 20.7  | 700  |
| 10/9/2019  | nip | 18.33 | 700  |
| 10/9/2019  | nip | 18.49 | 125  |
| 10/9/2019  | nip | 20.03 | 25   |
| 10/12/2019 | nip | 18    | 4    |
| 10/12/2019 | nip | 20.9  | 500  |
| 10/14/2019 | nip | 19.74 | 150  |
| 10/14/2019 | nip | 17.9  | 360  |
| 10/15/2019 | nip | 19.46 | 900  |
| 10/15/2019 | nip | 14    | 450  |
| 10/15/2019 | nip | 11.1  | 20   |
| 10/21/2019 | nip | 18.5  | 2500 |
| 10/26/2019 | nip | 20.8  | 1795 |
| 10/26/2019 | nip | 18.43 | 806  |
| 10/30/2019 | nip | 19.05 | 200  |
| 10/30/2019 | nip | 17.64 | 250  |
| 10/30/2019 | nip | 19.38 | 250  |
| 10/30/2019 | nip | 15.6  | 0.43 |
| 11/3/2019  | nip | 14.1  | 3.34 |
| 11/4/2019  | nip | 3.3   | 30   |
| 11/4/2019  | nip | 6.8   | 5    |
| 11/4/2019  | nip | 14.9  | 0.5  |

|            |     |       |        |
|------------|-----|-------|--------|
| 11/5/2019  | nip | 17.9  | 14     |
| 11/5/2019  | nip | 19.46 | 14     |
| 11/5/2019  | nip | 17.45 | 250    |
| 11/6/2019  | nip | 20.55 | 150    |
| 11/7/2019  | nip | 15.91 | 96     |
| 11/7/2019  | nip | 16.05 | 96     |
| 11/8/2019  | nip | 15.2  | 200    |
| 11/8/2019  | nip | 18.5  | 60     |
| 11/11/2019 | nip | 20.26 | 1000   |
| 11/17/2019 | nip | 19.51 | 1248   |
| 11/17/2019 | nip | 16.03 | 200    |
| 11/17/2019 | nip | 19.09 | 400    |
| 11/20/2019 | nip | 6.53  | 480    |
| 11/28/2019 | nip | 21.45 | 1096   |
| 11/28/2019 | nip | 20.3  | 239    |
| 11/29/2019 | nip | 18.03 | 4200   |
| 12/2/2019  | nip | 17.7  | 405.4  |
| 12/3/2019  | nip | 11.68 | 48     |
| 12/3/2019  | nip | 9.87  | 60     |
| 12/3/2019  | nip | 8.53  | 72     |
| 12/3/2019  | nip | 6.54  | 72     |
| 12/3/2019  | nip | 5.39  | 84     |
| 12/4/2019  | nip | 18.82 | 282.47 |
| 12/5/2019  | nip | 8.3   | 150    |
| 12/7/2019  | nip | 19.12 | 1000   |
| 12/7/2019  | nip | 17.17 | 601.4  |
| 12/9/2019  | nip | 18.9  | 600    |
| 12/9/2019  | nip | 17.2  | 1080   |
| 12/10/2019 | nip | 21.07 | 455.9  |
| 12/11/2019 | nip | 10.29 | 92.3   |
| 12/12/2019 | nip | 16.63 | 120    |
| 12/13/2019 | nip | 18.91 | 100    |
| 12/13/2019 | nip | 3.41  | 40     |
| 12/16/2019 | nip | 18.21 | 100    |
| 12/16/2019 | nip | 18.66 | 720    |
| 12/16/2019 | nip | 17.48 | 720    |
| 12/16/2019 | nip | 20.52 | 144    |
| 12/16/2019 | nip | 17.88 | 110    |
| 12/17/2019 | nip | 13.75 | 120    |
| 12/17/2019 | nip | 12.86 | 120    |
| 12/17/2019 | nip | 12.15 | 113    |
| 12/17/2019 | nip | 12.97 | 113    |
| 12/17/2019 | nip | 12.6  | 113    |
| 12/17/2019 | nip | 11.71 | 113    |
| 12/17/2019 | nip | 0.94  | 12     |

|            |     |       |        |
|------------|-----|-------|--------|
| 12/17/2019 | nip | 19.54 | 240    |
| 12/18/2019 | nip | 14.57 | 200    |
| 12/18/2019 | nip | 20.05 | 400    |
| 12/20/2019 | nip | 18.53 | 600    |
| 12/20/2019 | nip | 14.03 | 508.8  |
| 12/20/2019 | nip | 17.29 | 372    |
| 12/20/2019 | nip | 16.89 | 669.6  |
| 12/27/2019 | nip | 19.26 | 100    |
| 12/27/2019 | nip | 19.26 | 720    |
| 12/27/2019 | nip | 17.1  | 40     |
| 12/27/2019 | nip | 17.3  | 40     |
| 12/27/2019 | nip | 17.4  | 40     |
| 12/27/2019 | nip | 17.5  | 40     |
| 12/27/2019 | nip | 17.4  | 40     |
| 12/27/2019 | nip | 17.7  | 40     |
| 12/27/2019 | nip | 16.9  | 40     |
| 12/28/2019 | nip | 17.4  | 200    |
| 12/30/2019 | nip | 7.95  | 200    |
| 12/30/2019 | nip | 10.3  | 300    |
| 12/30/2019 | nip | 9.15  | 400    |
| 12/30/2019 | nip | 18.85 | 139.91 |
| 12/30/2019 | nip | 19.97 | 900    |
| 12/30/2019 | nip | 16.52 | 900    |
| 12/30/2019 | nip | 14.46 | 100    |
| 1/3/2020   | nip | 12.77 | 381.6  |
| 1/3/2020   | nip | 17.8  | 602.4  |
| 1/3/2020   | nip | 12.77 | 36     |
| 1/3/2020   | nip | 17.8  | 61.44  |
| 1/6/2020   | nip | 7.35  | 1000   |
| 1/8/2020   | nip | 20.7  | 500    |
| 1/13/2020  | nip | 21.98 | 1440   |
| 1/16/2020  | nip | 11.8  | 20.4   |
| 1/16/2020  | nip | 10    | 3600   |
| 1/24/2020  | nip | 18.9  | 1120   |
| 1/24/2020  | nip | 19.1  | 500    |
| 1/27/2020  | nip | 19    | 11.3   |
| 1/27/2020  | nip | 20.5  | 946    |
| 1/29/2020  | nip | 16.91 | 745    |
| 1/31/2020  | nip | 10.35 | 250.6  |
| 1/31/2020  | nip | 10.35 | 486.5  |
| 1/31/2020  | nip | 18.4  | 72     |
| 1/31/2020  | nip | 21.8  | 672    |
| 2/3/2020   | nip | 20.9  | 70     |
| 2/3/2020   | nip | 20.9  | 70     |
| 2/3/2020   | nip | 18.4  | 65     |

|           |     |       |        |
|-----------|-----|-------|--------|
| 2/3/2020  | nip | 18.4  | 65     |
| 2/5/2020  | nip | 20.12 | 158.99 |
| 2/12/2020 | nip | 8.28  | 480    |
| 2/14/2020 | nip | 17.5  | 250    |
| 2/14/2020 | nip | 18.3  | 240    |
| 2/14/2020 | nip | 17.5  | 375    |
| 2/14/2020 | nip | 17.5  | 25     |
| 3/10/2020 | nip | 13.9  | 144    |
| 3/10/2020 | nip | 15.9  | 144    |
| 3/30/2020 | nip | 18.2  | 500    |
| 3/30/2020 | nip | 19.67 | 500    |
| 4/3/2020  | nip | 19.34 | 5      |
| 4/21/2020 | nip | 10.3  | 0.4    |
| 4/21/2020 | nip | 7.9   | 7      |
| 4/21/2020 | nip | 9.9   | 2      |
| 4/24/2020 | nip | 12.53 | 400    |
| 4/27/2020 | nip | 18.24 | 1320   |
| 4/27/2020 | nip | 21.25 | 2400   |
| 5/19/2020 | nip | 17    | 168    |
| 5/19/2020 | nip | 15    | 288    |
| 5/19/2020 | nip | 15    | 84     |
| 5/21/2020 | nip | 15.25 | 408    |
| 7/6/2020  | nip | 13.16 | 600    |
| 9/24/2020 | nip | 16.5  | 200    |
| 9/24/2020 | nip | 16.5  | 200    |
| 9/24/2020 | nip | 17.1  | 300    |
| 9/24/2020 | nip | 17.1  | 300    |
| 9/24/2020 | nip | 18.7  | 500    |
| 9/24/2020 | nip | 18.7  | 500    |
| 2/28/2022 | nip | 2.31  | 600    |

Table S5. Power conversion efficiency and T<sub>80</sub> lifetime for pin perovskite solar cells. The data was extracted from the perovskite database by filtering for pin cells that contain valid efficiency and stability metrics.<sup>1</sup>

| <b>Publication date</b> | <b>Cell architecture</b> | <b>PCE, %</b> | <b>T<sub>80</sub>, hr</b> |
|-------------------------|--------------------------|---------------|---------------------------|
| 12/23/2014              | pin                      | 8.14          | 480                       |
| 12/30/2014              | pin                      | 7.65          | 0.26                      |
| 3/11/2015               | pin                      | 9.4           | 45                        |
| 3/11/2015               | pin                      | 10.2          | 290                       |
| 3/11/2015               | pin                      | 9.9           | 360                       |
| 5/4/2015                | pin                      | 16            | 39                        |
| 6/3/2015                | pin                      | 17            | 99                        |
| 6/17/2015               | pin                      | 10.77         | 0.17                      |
| 6/17/2015               | pin                      | 12.51         | 0.17                      |
| 8/12/2015               | pin                      | 15.23         | 1680                      |
| 8/24/2015               | pin                      | 5.47          | 0.4                       |

|            |     |       |       |
|------------|-----|-------|-------|
| 8/24/2015  | pin | 12    | 10    |
| 8/24/2015  | pin | 12.5  | 28    |
| 8/24/2015  | pin | 12.5  | 16    |
| 10/12/2015 | pin | 0.1   | 120   |
| 10/29/2015 | pin | 15.1  | 2880  |
| 11/23/2015 | pin | 11.65 | 5.27  |
| 11/23/2015 | pin | 8.39  | 8.97  |
| 11/23/2015 | pin | 12.71 | 16.2  |
| 11/23/2015 | pin | 13.71 | 168   |
| 11/23/2015 | pin | 14.42 | 140   |
| 11/23/2015 | pin | 9.38  | 100   |
| 11/24/2015 | pin | 13.24 | 535   |
| 11/24/2015 | pin | 13.52 | 230   |
| 11/30/2015 | pin | 8.23  | 62    |
| 11/30/2015 | pin | 9.74  | 180   |
| 11/30/2015 | pin | 0.64  | 383   |
| 12/4/2015  | pin | 15.85 | 480   |
| 12/4/2015  | pin | 12.21 | 72    |
| 1/11/2016  | pin | 13.6  | 0.2   |
| 1/11/2016  | pin | 12.3  | 0.4   |
| 1/14/2016  | pin | 7.21  | 840   |
| 2/10/2016  | pin | 7.2   | 1680  |
| 2/16/2016  | pin | 12.3  | 124   |
| 2/16/2016  | pin | 13.5  | 0.025 |
| 3/22/2016  | pin | 15.1  | 320   |
| 3/22/2016  | pin | 13.6  | 50    |
| 3/22/2016  | pin | 12.6  | 275   |
| 3/22/2016  | pin | 11.7  | 24    |
| 4/12/2016  | pin | 5.82  | 50    |
| 4/12/2016  | pin | 12.98 | 100   |
| 4/26/2016  | pin | 9.2   | 1000  |
| 4/26/2016  | pin | 12.98 | 1000  |
| 5/11/2016  | pin | 12.05 | 101   |
| 5/11/2016  | pin | 16.97 | 377   |
| 5/11/2016  | pin | 12.05 | 9     |
| 5/11/2016  | pin | 16.97 | 99    |
| 6/17/2016  | pin | 10.1  | 1000  |
| 6/28/2016  | pin | 12.76 | 140   |
| 6/28/2016  | pin | 7.93  | 85    |
| 6/28/2016  | pin | 9     | 52    |
| 7/4/2016   | pin | 10.8  | 5     |
| 7/4/2016   | pin | 15.2  | 440   |
| 7/4/2016   | pin | 10.8  | 130   |
| 7/4/2016   | pin | 15.2  | 580   |
| 7/4/2016   | pin | 10.8  | 300   |

|            |     |       |      |
|------------|-----|-------|------|
| 7/25/2016  | pin | 3.4   | 20   |
| 7/25/2016  | pin | 6.28  | 30   |
| 7/25/2016  | pin | 6.8   | 40   |
| 9/9/2016   | pin | 0.49  | 1.8  |
| 9/13/2016  | pin | 6.3   | 125  |
| 9/13/2016  | pin | 6.3   | 24   |
| 9/13/2016  | pin | 17.3  | 33   |
| 9/21/2016  | pin | 3.5   | 168  |
| 9/29/2016  | pin | 16.8  | 550  |
| 10/5/2016  | pin | 17.56 | 50   |
| 10/5/2016  | pin | 16.6  | 115  |
| 10/6/2016  | pin | 15.1  | 552  |
| 10/6/2016  | pin | 11.79 | 30   |
| 10/14/2016 | pin | 12.84 | 576  |
| 10/14/2016 | pin | 16.25 | 984  |
| 10/16/2016 | pin | 16.1  | 128  |
| 10/16/2016 | pin | 17.5  | 207  |
| 10/21/2016 | pin | 14.5  | 90   |
| 10/21/2016 | pin | 15.1  | 90   |
| 11/10/2016 | pin | 9.7   | 5000 |
| 11/10/2016 | pin | 9.06  | 1400 |
| 11/21/2016 | pin | 2.08  | 1.3  |
| 11/21/2016 | pin | 14.69 | 950  |
| 11/21/2016 | pin | 10.73 | 150  |
| 11/28/2016 | pin | 8     | 42   |
| 11/28/2016 | pin | 7.1   | 103  |
| 11/30/2016 | pin | 12.3  | 50   |
| 12/6/2016  | pin | 13.1  | 720  |
| 12/8/2016  | pin | 12.8  | 800  |
| 1/6/2017   | pin | 2.14  | 1.75 |
| 1/17/2017  | pin | 10.1  | 50   |
| 1/17/2017  | pin | 12.2  | 50   |
| 2/17/2017  | pin | 19.6  | 720  |
| 2/17/2017  | pin | 19.6  | 3    |
| 2/23/2017  | pin | 12.2  | 335  |
| 2/23/2017  | pin | 16.7  | 850  |
| 2/24/2017  | pin | 11.33 | 3.33 |
| 2/24/2017  | pin | 12.18 | 6.43 |
| 2/24/2017  | pin | 12.68 | 5.91 |
| 2/24/2017  | pin | 11.58 | 8.1  |
| 4/20/2017  | pin | 11.9  | 24   |
| 4/20/2017  | pin | 16.5  | 1670 |
| 4/26/2017  | pin | 7.05  | 168  |
| 4/26/2017  | pin | 8.09  | 348  |
| 5/24/2017  | pin | 15.15 | 400  |

|            |     |       |       |
|------------|-----|-------|-------|
| 6/5/2017   | pin | 15.38 | 100   |
| 6/5/2017   | pin | 12.14 | 190   |
| 6/5/2017   | pin | 14.39 | 190   |
| 6/5/2017   | pin | 16.33 | 300   |
| 6/9/2017   | pin | 12.7  | 12    |
| 6/10/2017  | pin | 12.83 | 100   |
| 6/12/2017  | pin | 15.1  | 450   |
| 6/12/2017  | pin | 17.44 | 360   |
| 6/16/2017  | pin | 6.9   | 336   |
| 6/17/2017  | pin | 10.4  | 61    |
| 6/23/2017  | pin | 9.1   | 1     |
| 6/28/2017  | pin | 12.58 | 120   |
| 7/11/2017  | pin | 12.44 | 10    |
| 7/11/2017  | pin | 14.35 | 1320  |
| 7/11/2017  | pin | 15    | 1200  |
| 7/14/2017  | pin | 7.48  | 400   |
| 7/19/2017  | pin | 14.07 | 8     |
| 7/25/2017  | pin | 14.73 | 200   |
| 7/26/2017  | pin | 14.3  | 210   |
| 7/26/2017  | pin | 12.8  | 101.4 |
| 8/8/2017   | pin | 16    | 149   |
| 8/17/2017  | pin | 8.9   | 38.2  |
| 8/17/2017  | pin | 5     | 4.07  |
| 8/24/2017  | pin | 9.17  | 1080  |
| 8/24/2017  | pin | 8.38  | 1080  |
| 9/7/2017   | pin | 14.5  | 360   |
| 9/8/2017   | pin | 18.84 | 240   |
| 9/8/2017   | pin | 16    | 26    |
| 9/8/2017   | pin | 14.4  | 15    |
| 9/9/2017   | pin | 13.28 | 288   |
| 9/9/2017   | pin | 10.24 | 24    |
| 9/22/2017  | pin | 10.76 | 400   |
| 9/26/2017  | pin | 14.2  | 39    |
| 9/26/2017  | pin | 14.9  | 97    |
| 9/26/2017  | pin | 15.9  | 105   |
| 10/4/2017  | pin | 18    | 480   |
| 10/9/2017  | pin | 17.13 | 1500  |
| 10/14/2017 | pin | 17    | 720   |
| 10/23/2017 | pin | 16.14 | 360   |
| 10/31/2017 | pin | 9.73  | 135   |
| 11/26/2017 | pin | 13.6  | 8     |
| 11/26/2017 | pin | 16.9  | 13    |
| 11/27/2017 | pin | 14.3  | 155   |
| 11/27/2017 | pin | 14.3  | 5     |
| 12/1/2017  | pin | 18.21 | 0.9   |

|            |     |       |      |
|------------|-----|-------|------|
| 12/7/2017  | pin | 10.6  | 670  |
| 12/22/2017 | pin | 15.1  | 72   |
| 12/22/2017 | pin | 16.1  | 432  |
| 12/29/2017 | pin | 13.1  | 0.1  |
| 1/4/2018   | pin | 15.14 | 72   |
| 1/4/2018   | pin | 10.69 | 36   |
| 1/5/2018   | pin | 15.2  | 400  |
| 1/5/2018   | pin | 17.4  | 168  |
| 1/5/2018   | pin | 16.4  | 720  |
| 1/8/2018   | pin | 13.51 | 100  |
| 1/8/2018   | pin | 16.72 | 100  |
| 1/15/2018  | pin | 13.5  | 48   |
| 1/17/2018  | pin | 16.26 | 171  |
| 1/17/2018  | pin | 16.89 | 588  |
| 1/22/2018  | pin | 16.4  | 90   |
| 1/22/2018  | pin | 19.6  | 100  |
| 1/22/2018  | pin | 17.1  | 850  |
| 1/31/2018  | pin | 14.24 | 381  |
| 1/31/2018  | pin | 12.2  | 112  |
| 2/6/2018   | pin | 17.02 | 160  |
| 2/13/2018  | pin | 14.3  | 37.5 |
| 2/21/2018  | pin | 18.52 | 600  |
| 3/14/2018  | pin | 4.48  | 1    |
| 3/18/2018  | pin | 16.29 | 430  |
| 3/28/2018  | pin | 17    | 200  |
| 4/3/2018   | pin | 16.13 | 480  |
| 4/4/2018   | pin | 13.14 | 408  |
| 4/4/2018   | pin | 16.53 | 288  |
| 4/4/2018   | pin | 16.98 | 6    |
| 4/4/2018   | pin | 14.81 | 6    |
| 4/6/2018   | pin | 12.46 | 16.6 |
| 4/7/2018   | pin | 13.44 | 323  |
| 4/11/2018  | pin | 12.46 | 75   |
| 4/11/2018  | pin | 12.88 | 150  |
| 4/11/2018  | pin | 13.97 | 135  |
| 4/11/2018  | pin | 16.47 | 160  |
| 4/11/2018  | pin | 11.96 | 11   |
| 4/11/2018  | pin | 15.43 | 1    |
| 4/11/2018  | pin | 18.45 | 1    |
| 4/11/2018  | pin | 13.9  | 84   |
| 4/16/2018  | pin | 1     | 0.03 |
| 4/16/2018  | pin | 5.6   | 0.33 |
| 4/17/2018  | pin | 10.3  | 74   |
| 5/3/2018   | pin | 7.23  | 0.17 |
| 5/3/2018   | pin | 12.91 | 0.75 |



|           |     |       |        |
|-----------|-----|-------|--------|
| 5/3/2018  | pin | 8.78  | 0.35   |
| 5/4/2018  | pin | 15.3  | 250    |
| 5/4/2018  | pin | 13.2  | 120    |
| 5/4/2018  | pin | 15.3  | 60     |
| 5/4/2018  | pin | 13.2  | 30     |
| 5/7/2018  | pin | 14.7  | 300    |
| 5/9/2018  | pin | 12.1  | 360    |
| 5/14/2018 | pin | 0.99  | 216    |
| 5/22/2018 | pin | 13.2  | 229    |
| 5/28/2018 | pin | 14.31 | 220    |
| 5/29/2018 | pin | 16.63 | 530    |
| 5/29/2018 | pin | 17.16 | 630    |
| 5/31/2018 | pin | 18.67 | 50     |
| 5/31/2018 | pin | 18.67 | 5      |
| 5/31/2018 | pin | 20.13 | 250    |
| 6/4/2018  | pin | 13.7  | 110    |
| 6/4/2018  | pin | 15.09 | 624    |
| 6/7/2018  | pin | 5.1   | 200    |
| 6/11/2018 | pin | 13    | 720    |
| 6/11/2018 | pin | 0.61  | 440    |
| 6/11/2018 | pin | 5.24  | 180    |
| 6/11/2018 | pin | 14.49 | 72     |
| 6/11/2018 | pin | 17.1  | 115.92 |
| 6/18/2018 | pin | 19.05 | 72     |
| 6/18/2018 | pin | 12.17 | 0.5    |
| 6/18/2018 | pin | 18.03 | 1      |
| 6/18/2018 | pin | 18.08 | 120    |
| 6/19/2018 | pin | 14.52 | 12     |
| 6/19/2018 | pin | 14.4  | 10     |
| 6/19/2018 | pin | 15    | 227    |
| 6/19/2018 | pin | 10.5  | 62     |
| 6/23/2018 | pin | 16.9  | 360    |
| 6/28/2018 | pin | 14.9  | 67     |
| 7/2/2018  | pin | 12.8  | 2000   |
| 7/3/2018  | pin | 16.2  | 108    |
| 7/3/2018  | pin | 17.9  | 37     |
| 7/9/2018  | pin | 19.6  | 720    |
| 7/10/2018 | pin | 13.2  | 50     |
| 7/13/2018 | pin | 13.9  | 70     |
| 7/13/2018 | pin | 11.8  | 149    |
| 7/13/2018 | pin | 12.3  | 48     |
| 7/17/2018 | pin | 18.16 | 720    |
| 8/4/2018  | pin | 16.7  | 120    |
| 8/7/2018  | pin | 11.26 | 350    |
| 8/7/2018  | pin | 12.51 | 350    |

|            |     |       |      |
|------------|-----|-------|------|
| 8/7/2018   | pin | 10.2  | 91   |
| 8/8/2018   | pin | 15.66 | 720  |
| 8/11/2018  | pin | 8.61  | 120  |
| 8/11/2018  | pin | 12.29 | 650  |
| 8/11/2018  | pin | 8.46  | 144  |
| 8/11/2018  | pin | 13.54 | 720  |
| 8/11/2018  | pin | 9.01  | 720  |
| 8/11/2018  | pin | 7.92  | 120  |
| 8/11/2018  | pin | 9.77  | 700  |
| 8/11/2018  | pin | 13.45 | 36   |
| 8/11/2018  | pin | 11.05 | 24   |
| 8/11/2018  | pin | 15.78 | 72   |
| 8/11/2018  | pin | 10.56 | 24   |
| 8/11/2018  | pin | 10.81 | 20   |
| 8/29/2018  | pin | 15.06 | 1500 |
| 9/12/2018  | pin | 17.98 | 200  |
| 9/12/2018  | pin | 13.88 | 140  |
| 9/13/2018  | pin | 13.3  | 2800 |
| 9/13/2018  | pin | 13.8  | 2600 |
| 9/13/2018  | pin | 14.8  | 1600 |
| 9/13/2018  | pin | 15    | 1300 |
| 9/13/2018  | pin | 15.2  | 800  |
| 9/13/2018  | pin | 15.3  | 200  |
| 9/13/2018  | pin | 13.8  | 100  |
| 9/19/2018  | pin | 2.78  | 218  |
| 9/19/2018  | pin | 3.62  | 447  |
| 10/16/2018 | pin | 12.3  | 1440 |
| 10/19/2018 | pin | 14.15 | 50   |
| 10/23/2018 | pin | 18.38 | 0.5  |
| 10/23/2018 | pin | 18.53 | 0.16 |
| 10/23/2018 | pin | 15.55 | 1.16 |
| 10/23/2018 | pin | 17.2  | 110  |
| 10/23/2018 | pin | 13.2  | 55   |
| 10/23/2018 | pin | 17    | 55   |
| 10/29/2018 | pin | 14.4  | 216  |
| 11/1/2018  | pin | 12.5  | 87   |
| 11/2/2018  | pin | 16.72 | 750  |
| 11/2/2018  | pin | 19.95 | 2800 |
| 11/4/2018  | pin | 10.3  | 25   |
| 11/4/2018  | pin | 13.4  | 25   |
| 11/4/2018  | pin | 12.3  | 100  |
| 11/4/2018  | pin | 12.3  | 230  |
| 11/4/2018  | pin | 12.2  | 780  |
| 11/4/2018  | pin | 10.9  | 950  |
| 11/4/2018  | pin | 10.3  | 20   |

|            |     |       |      |
|------------|-----|-------|------|
| 11/4/2018  | pin | 13.4  | 30   |
| 11/4/2018  | pin | 12.3  | 40   |
| 11/4/2018  | pin | 12.3  | 40   |
| 11/4/2018  | pin | 12.2  | 40   |
| 11/4/2018  | pin | 10.9  | 330  |
| 11/7/2018  | pin | 11.22 | 100  |
| 11/10/2018 | pin | 9.32  | 1464 |
| 11/10/2018 | pin | 12.78 | 1464 |
| 11/10/2018 | pin | 18.15 | 1000 |
| 11/27/2018 | pin | 18.16 | 240  |
| 11/27/2018 | pin | 19.26 | 720  |
| 11/28/2018 | pin | 17.29 | 6709 |
| 11/29/2018 | pin | 19.16 | 16   |
| 11/30/2018 | pin | 6.76  | 500  |
| 12/13/2018 | pin | 20    | 720  |
| 12/13/2018 | pin | 15    | 420  |
| 12/18/2018 | pin | 3.4   | 80   |
| 12/18/2018 | pin | 7     | 100  |
| 12/22/2018 | pin | 18.36 | 336  |
| 12/22/2018 | pin | 17.75 | 336  |
| 12/27/2018 | pin | 17.77 | 960  |
| 12/28/2018 | pin | 7.2   | 0.25 |
| 12/28/2018 | pin | 13    | 0.75 |
| 12/28/2018 | pin | 8.8   | 0.35 |
| 1/1/2019   | pin | 13.87 | 750  |
| 1/1/2019   | pin | 13.83 | 800  |
| 1/2/2019   | pin | 17.81 | 720  |
| 1/9/2019   | pin | 3.02  | 50   |
| 1/9/2019   | pin | 17.01 | 150  |
| 1/9/2019   | pin | 15.43 | 150  |
| 1/9/2019   | pin | 16.48 | 150  |
| 1/9/2019   | pin | 17.46 | 150  |
| 1/11/2019  | pin | 17.5  | 300  |
| 1/21/2019  | pin | 11.18 | 15   |
| 1/23/2019  | pin | 13.7  | 60   |
| 1/24/2019  | pin | 14.38 | 300  |
| 1/24/2019  | pin | 17.2  | 500  |
| 1/28/2019  | pin | 18.4  | 2    |
| 1/28/2019  | pin | 18.88 | 1    |
| 1/28/2019  | pin | 16.16 | 6    |
| 1/28/2019  | pin | 16.52 | 1    |
| 2/4/2019   | pin | 13.82 | 400  |
| 2/4/2019   | pin | 13.82 | 80   |
| 2/4/2019   | pin | 14.4  | 0.3  |
| 2/4/2019   | pin | 13.2  | 0.6  |

|           |     |       |       |
|-----------|-----|-------|-------|
| 2/4/2019  | pin | 15.5  | 0.75  |
| 2/4/2019  | pin | 15.7  | 0.6   |
| 2/4/2019  | pin | 16.9  | 1.2   |
| 2/22/2019 | pin | 18.16 | 200   |
| 2/22/2019 | pin | 19.33 | 459   |
| 2/27/2019 | pin | 13.8  | 2200  |
| 2/27/2019 | pin | 16.1  | 3400  |
| 2/27/2019 | pin | 15.1  | 3400  |
| 3/6/2019  | pin | 18.75 | 645   |
| 3/7/2019  | pin | 13.72 | 4.02  |
| 3/7/2019  | pin | 16.64 | 600   |
| 3/9/2019  | pin | 18.3  | 100   |
| 3/15/2019 | pin | 15.26 | 100   |
| 3/15/2019 | pin | 14.98 | 100   |
| 3/26/2019 | pin | 16.11 | 75    |
| 3/27/2019 | pin | 2.71  | 1.8   |
| 3/28/2019 | pin | 17.32 | 960   |
| 4/2/2019  | pin | 11.97 | 500   |
| 4/2/2019  | pin | 12.58 | 524   |
| 4/13/2019 | pin | 20    | 890   |
| 4/15/2019 | pin | 16.61 | 26    |
| 4/15/2019 | pin | 17.23 | 370   |
| 4/15/2019 | pin | 20.67 | 1045  |
| 4/22/2019 | pin | 17.91 | 827.8 |
| 4/22/2019 | pin | 15.1  | 609.6 |
| 4/25/2019 | pin | 15.9  | 179   |
| 4/25/2019 | pin | 18.21 | 385   |
| 4/29/2019 | pin | 8.04  | 20    |
| 4/29/2019 | pin | 10.15 | 20    |
| 4/30/2019 | pin | 18.12 | 80    |
| 4/30/2019 | pin | 20.55 | 800   |
| 5/2/2019  | pin | 18    | 40    |
| 5/2/2019  | pin | 20    | 160   |
| 5/2/2019  | pin | 12.19 | 40    |
| 5/2/2019  | pin | 12.74 | 40    |
| 5/2/2019  | pin | 13.72 | 1400  |
| 5/2/2019  | pin | 20    | 100   |
| 5/7/2019  | pin | 19.1  | 290   |
| 5/7/2019  | pin | 20.1  | 480   |
| 5/7/2019  | pin | 19.1  | 242   |
| 5/7/2019  | pin | 19.8  | 175   |
| 5/7/2019  | pin | 21.3  | 624   |
| 5/18/2019 | pin | 9.19  | 207   |
| 5/18/2019 | pin | 11.32 | 270   |
| 5/24/2019 | pin | 20.3  | 30    |

|           |     |       |        |
|-----------|-----|-------|--------|
| 5/27/2019 | pin | 10.6  | 240    |
| 5/27/2019 | pin | 14.9  | 240    |
| 6/2/2019  | pin | 14.91 | 500    |
| 6/2/2019  | pin | 17.42 | 500    |
| 6/5/2019  | pin | 5.55  | 120    |
| 6/5/2019  | pin | 8.82  | 48     |
| 6/5/2019  | pin | 6.42  | 24     |
| 6/7/2019  | pin | 17.2  | 20     |
| 6/7/2019  | pin | 16.34 | 120    |
| 6/17/2019 | pin | 17.08 | 145    |
| 6/17/2019 | pin | 20.34 | 335    |
| 6/17/2019 | pin | 21.01 | 600    |
| 6/18/2019 | pin | 17.01 | 480    |
| 6/18/2019 | pin | 15.2  | 240    |
| 6/22/2019 | pin | 15.34 | 70     |
| 6/25/2019 | pin | 14.53 | 700    |
| 6/25/2019 | pin | 18.6  | 700    |
| 6/28/2019 | pin | 12.5  | 80     |
| 6/28/2019 | pin | 15.7  | 100    |
| 7/3/2019  | pin | 15.9  | 97     |
| 7/3/2019  | pin | 19    | 100    |
| 7/3/2019  | pin | 12.5  | 100    |
| 7/8/2019  | pin | 16.01 | 672    |
| 7/8/2019  | pin | 17.69 | 960    |
| 7/8/2019  | pin | 17.02 | 370    |
| 7/8/2019  | pin | 17.46 | 160    |
| 7/16/2019 | pin | 12.85 | 720    |
| 7/16/2019 | pin | 18.45 | 200    |
| 7/16/2019 | pin | 19.73 | 280    |
| 7/19/2019 | pin | 13.86 | 720    |
| 7/19/2019 | pin | 8.94  | 216    |
| 7/19/2019 | pin | 5.87  | 40     |
| 7/19/2019 | pin | 5.87  | 193    |
| 7/23/2019 | pin | 13.24 | 170    |
| 7/23/2019 | pin | 15.37 | 240    |
| 7/27/2019 | pin | 17.15 | 140    |
| 7/27/2019 | pin | 16.24 | 80     |
| 7/31/2019 | pin | 5     | 144    |
| 8/5/2019  | pin | 18.69 | 131.29 |
| 8/7/2019  | pin | 17.85 | 340    |
| 8/19/2019 | pin | 11.65 | 500    |
| 8/19/2019 | pin | 11.17 | 500    |
| 8/20/2019 | pin | 14.81 | 840    |
| 8/21/2019 | pin | 18.55 | 500    |
| 8/22/2019 | pin | 19.1  | 17     |

|            |     |       |       |
|------------|-----|-------|-------|
| 8/22/2019  | pin | 21.37 | 18.5  |
| 8/23/2019  | pin | 19.79 | 720   |
| 8/26/2019  | pin | 15    | 47    |
| 8/26/2019  | pin | 10.3  | 25    |
| 8/29/2019  | pin | 13.5  | 150   |
| 8/30/2019  | pin | 15.89 | 2400  |
| 8/30/2019  | pin | 4.77  | 40    |
| 8/30/2019  | pin | 7.86  | 350   |
| 9/2/2019   | pin | 17.5  | 40    |
| 9/3/2019   | pin | 14.01 | 200   |
| 9/3/2019   | pin | 14.01 | 200   |
| 9/7/2019   | pin | 12.18 | 450   |
| 9/7/2019   | pin | 15.15 | 450   |
| 9/8/2019   | pin | 14.35 | 100   |
| 9/11/2019  | pin | 17.3  | 117   |
| 9/25/2019  | pin | 10.42 | 100   |
| 9/25/2019  | pin | 13.81 | 322   |
| 9/25/2019  | pin | 16.94 | 1000  |
| 9/30/2019  | pin | 11.2  | 600   |
| 10/8/2019  | pin | 18.52 | 2160  |
| 10/9/2019  | pin | 10.5  | 900   |
| 10/9/2019  | pin | 10.61 | 700   |
| 10/9/2019  | pin | 11.19 | 700   |
| 10/9/2019  | pin | 11.08 | 600   |
| 10/15/2019 | pin | 12.67 | 1032  |
| 10/15/2019 | pin | 11.97 | 2160  |
| 10/23/2019 | pin | 11.1  | 50    |
| 10/28/2019 | pin | 13.8  | 22    |
| 10/28/2019 | pin | 15.08 | 30    |
| 10/28/2019 | pin | 15.81 | 41    |
| 10/30/2019 | pin | 14.1  | 700   |
| 10/30/2019 | pin | 7.34  | 100   |
| 11/4/2019  | pin | 17.3  | 750   |
| 11/5/2019  | pin | 20.46 | 720   |
| 11/14/2019 | pin | 9.68  | 24    |
| 11/14/2019 | pin | 9.72  | 100   |
| 11/19/2019 | pin | 7.57  | 100.6 |
| 11/21/2019 | pin | 20.05 | 1500  |
| 11/21/2019 | pin | 17.46 | 900   |
| 12/4/2019  | pin | 15.9  | 200   |
| 12/9/2019  | pin | 15.83 | 400   |
| 12/17/2019 | pin | 5.19  | 156   |
| 12/17/2019 | pin | 4.48  | 432   |
| 12/18/2019 | pin | 17.19 | 100   |
| 12/19/2019 | pin | 20.31 | 2     |

|            |     |       |        |
|------------|-----|-------|--------|
| 12/19/2019 | pin | 16.54 | 2      |
| 12/23/2019 | pin | 6.34  | 1      |
| 12/27/2019 | pin | 5.64  | 70.8   |
| 12/28/2019 | pin | 18.11 | 264    |
| 12/28/2019 | pin | 15.38 | 48     |
| 1/9/2020   | pin | 12.51 | 653    |
| 1/10/2020  | pin | 11    | 80     |
| 1/11/2020  | pin | 18.13 | 210    |
| 1/11/2020  | pin | 18.13 | 3      |
| 1/11/2020  | pin | 20.18 | 13     |
| 1/13/2020  | pin | 20.4  | 534.8  |
| 1/13/2020  | pin | 20.4  | 14.1   |
| 1/13/2020  | pin | 14.9  | 20     |
| 1/17/2020  | pin | 17.02 | 140    |
| 1/20/2020  | pin | 20    | 600    |
| 1/22/2020  | pin | 16.57 | 200    |
| 1/22/2020  | pin | 19.15 | 430    |
| 1/24/2020  | pin | 8.7   | 142.8  |
| 1/24/2020  | pin | 11.6  | 336.24 |
| 1/24/2020  | pin | 16.5  | 125    |
| 1/31/2020  | pin | 16.83 | 612    |
| 2/5/2020   | pin | 14.4  | 50.6   |
| 2/5/2020   | pin | 16.6  | 212.8  |
| 3/9/2020   | pin | 7.91  | 700    |
| 3/27/2020  | pin | 6.48  | 60     |
| 4/7/2020   | pin | 17.23 | 480    |
| 4/21/2020  | pin | 13.1  | 6.3    |
| 4/21/2020  | pin | 13    | 7.1    |
| 4/21/2020  | pin | 11.8  | 8.3    |
| 5/26/2020  | pin | 13.18 | 240    |
| 5/26/2020  | pin | 16.7  | 600    |
| 5/26/2020  | pin | 15.03 | 360    |
| 5/26/2020  | pin | 18.73 | 720    |
| 5/28/2020  | pin | 19.9  | 1350   |
| 5/28/2020  | pin | 16.4  | 500    |
| 7/8/2020   | pin | 19.9  | 720    |
| 7/8/2020   | pin | 18.2  | 240    |
| 7/21/2020  | pin | 18.7  | 550    |
| 7/21/2020  | pin | 17.3  | 80     |
| 6/11/2024  | pin | 19.05 | 0.533  |
| 6/11/2024  | pin | 20.89 | 3.13   |
| 6/11/2024  | pin | 17.61 | 4.85   |
| 6/11/2024  | pin | 16.93 | 2.467  |

---

## Supplemental references

1. The Perovskite Database, <https://www.perovskitedatabase.com/>, (accessed May 20th, 2023).
